# Supplementary material for: TMEM106C contributes to the malignant characteristics and poor prognosis of hepatocellular carcinoma
Source: publisher site journal article supplement (doi:10.18632/aging.202487), 2021-02-11
Supplement: Supplementary file [file aging-v13i4-202487-supplementary-material-SD1.pdf]

**SUPPLEMENTARY FIGURE**

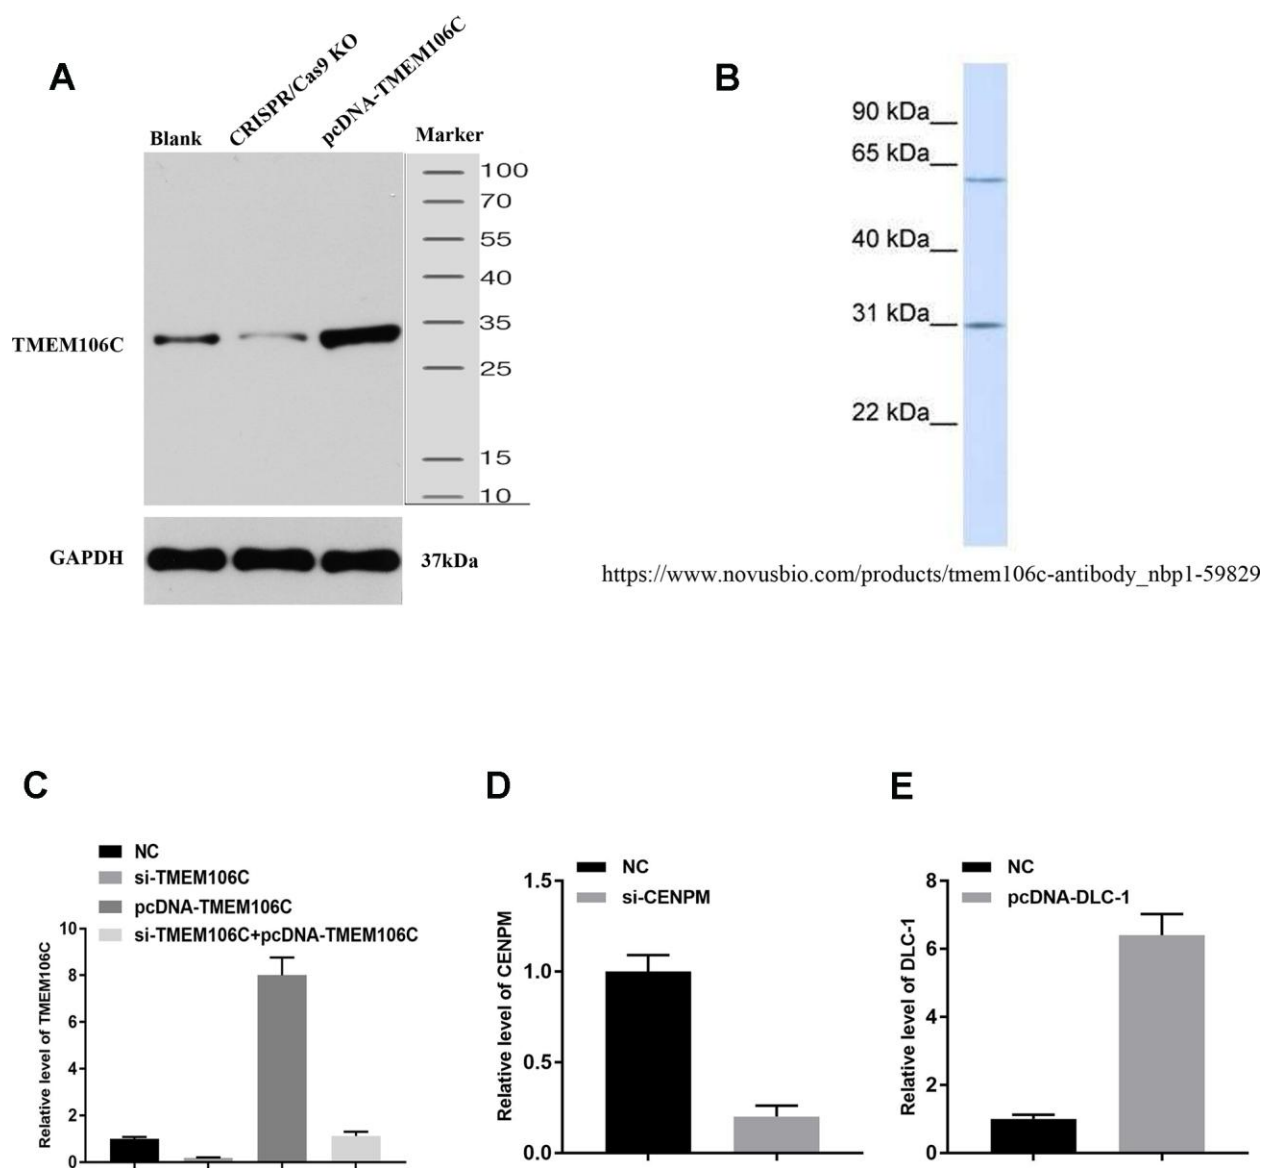

**Supplementary Figure 1.** (A) WB of TMEM106C in 7721 cells transfected with a TMEM106C CRISPR/Cas9 KO plasmid or a pcDNA-TMEM106C expression plasmid. (B) The WB image following detection by TMEM106C antibody from the Novus website. (C) Relative levels of TMEM106C in 7721 cells transfected with si-TMEM106C or a pcDNA-TMEM106C expression plasmid. (D) Relative level of CENPM in 7721 cells transfected with si-CENPM. (E) Relative level of DLC-1 in 7721 cells transfected with a pcDNA-DLC-1 expression plasmid.
