# Supplementary material for: TMEM106C contributes to the malignant characteristics and poor prognosis of hepatocellular carcinoma
Source: publisher site journal article supplement (doi:10.18632/aging.202487), 2021-02-11
Supplement: Supplementary file [file aging-v13i4-202487-supplementary-material-SD3.pdf]

## SUPPLEMENTARY TABLES

Supplementary Table 2. Sequences of primers for human genes analyzed by real-time PCR.

| Real-time PCR<br>prime | Sense (5'→3')         | Antisense (5'→3')      |
|------------------------|-----------------------|------------------------|
| TMEM106C               | CGAAGAGGCTGGACATGACA  | GGCTTCTTCCTGCTCTCGTT   |
| GAPDH                  | CATCATCCCTGCCTCTACTGG | CTGGTGAATTTTACCGGGAAG  |
| DLC-1                  | TCCTCTCCATCAGGCACACC  | TCCGTGGACTCAGTGTGAGAAG |
| CENPM                  | CACGGAGGATGCTCTTCTGC  | CACGATCAGGTCAATTCGGG   |

**Supplementary Table 3. Sequences of the inserted fragment in pcDNA-TMEM106C and pcDNA-DLC1 plasmids.**

|              |                                                                                                                                                                                                                                                                                                                                                                                                                                                                                                                                                                                                                                                                                                                                                                                                                                                                                                                                                                                                                                                                                                                                                                                                                                                                                                                                                                                                                                                                                                                                                                                                                                                                                                                                                                                                                                                                                                                                                                                                                                                                                                                                                                                                                                                                                                                                                                                                                                                                                                                                                                                                                                                                                                                                                                                                                                                                                                                                                                                                                                                                                                                                                                                                                                                                                                                                                                                                                                                        |
|--------------|--------------------------------------------------------------------------------------------------------------------------------------------------------------------------------------------------------------------------------------------------------------------------------------------------------------------------------------------------------------------------------------------------------------------------------------------------------------------------------------------------------------------------------------------------------------------------------------------------------------------------------------------------------------------------------------------------------------------------------------------------------------------------------------------------------------------------------------------------------------------------------------------------------------------------------------------------------------------------------------------------------------------------------------------------------------------------------------------------------------------------------------------------------------------------------------------------------------------------------------------------------------------------------------------------------------------------------------------------------------------------------------------------------------------------------------------------------------------------------------------------------------------------------------------------------------------------------------------------------------------------------------------------------------------------------------------------------------------------------------------------------------------------------------------------------------------------------------------------------------------------------------------------------------------------------------------------------------------------------------------------------------------------------------------------------------------------------------------------------------------------------------------------------------------------------------------------------------------------------------------------------------------------------------------------------------------------------------------------------------------------------------------------------------------------------------------------------------------------------------------------------------------------------------------------------------------------------------------------------------------------------------------------------------------------------------------------------------------------------------------------------------------------------------------------------------------------------------------------------------------------------------------------------------------------------------------------------------------------------------------------------------------------------------------------------------------------------------------------------------------------------------------------------------------------------------------------------------------------------------------------------------------------------------------------------------------------------------------------------------------------------------------------------------------------------------------------------|
| TMEM106C ORF | <p>ATGGGGTCTCAGCATTCCGCTGCTGCTCGCCCCTCCTCCTGCAGGCGAAAGCAAGAAGATGA<br/> CAGGGACGGTTTGCTGGCTGAACGAGAGCAGGAAGAAGCCATTGCTCAGTTCCCATATGTGG<br/> AATCACCGGGAGAGATAGCATACCTGTCTCACGTGCCAGGGGACAGGCTACATTCCAACA<br/> GAGCAAGTAAATGAGTTGGTGGCTTTGATCCACACAGTGATCAGAGATTGCGCCCTCAGCG<br/> AACTAAGCAATATGTCCTCCTGTCCATCCTTGTCTCCTGGCATCTGGTTTGGTGGTTTC<br/> TTCTGTTTTCCGCATTCAGTCTTGTGGATGATGACGGCATCAAAGTGGTGAAAGTACATTT<br/> AATAAGCAAGACTCCCTTGTAAATTCTACCATCATGGCCACCCTGAAAATCAGGAACTCCAAC<br/> TTCTACACGGTGGCAGTGACCAGCCTGTCCAGCCAGATTGAGTACATGAACACAGTGGTGAA<br/> TTTTACCGGGAAGGCCGAGATGGGAGGACCGTTTTCCATGTGTACTTCTTCTGCACGGTACC<br/> TGAGATCCTGGTGCACAACATAGTGATCTTATCGGAACTTCAGTGAAGATTCATACATTGGC<br/> CTCATGACCCAGAGCTCCTTGGAGACACATCATACTGTGGATTGTGGAGGAAATCCACAGCT<br/> ATTTAA</p>                                                                                                                                                                                                                                                                                                                                                                                                                                                                                                                                                                                                                                                                                                                                                                                                                                                                                                                                                                                                                                                                                                                                                                                                                                                                                                                                                                                                                                                                                                                                                                                                                                                                                                                                                                                                                                                                                                                                                                                                                                                                                                                                                                                                                                                                                                                                                                                                                                                                                                                                                                                                                                                                    |
| DLC1 ORF     | <p>ATGAAGCTAGAAATTAGTCTCATCGGAAACGAAGTGACGATTGACGAGGATGAGCCTTG<br/> TGCCATCAGTGGCAAATGGACTTTCCAAAGGGACAGCAAGAGGTGGTCCCGGCTTGAAGAG<br/> TTTGATGTCTTTTCTCCAAAACAAGACCTGGTCCCTGGGTCCCCAGACGACTCCCACCCGAA<br/> GGACGGCCCCAGCCCCGGAGGCACGCTGATGGACCTCAGCGAGCGCCAGGAGGTGTCTTCC<br/> GTCCGAGCCTCAGCAGCACTGGCAGCCTCCCCAGCCACGCGCCCCCAGCAGGATGATGCTG<br/> CACCCCCGGACTAACTCCGTTCATCAGCGTTTGTCTCCAGCAACTTGGCAGGCAATGACG<br/> ACTCTTTCGGCAGCCTGCCCTCTCCAAGGAACTGTCCAGCTTCAGCTTCAGCATGAAAGGC<br/> CACGAAAAAACTGCCAAGTCCAAGACGCGCAGTCTGCTGAAACGGATGGAGAGCCTGAAGC<br/> TCAAGAGCTCCCATCACAGCAAGCACAAAGCGCCCTCAAAGCTGGGGTTGATCATCAGCGGG<br/> CCCATTTGCAAGAGGGGATGGATGAGGAGAAGCTGAAGCAGTCAACTGCGTGGAGATCTC<br/> CGCCCTCAATGGCAACCGCATCAACGTCCCCATGGTACGAAAGAGGAGCGCTTTCCAACCTCA<br/> CGCAGACCAGCAGCAGCAGCAGCCAGTCCGAGACCAGCAGCGCGGTGAGCAGCAGCCAGCCC<br/> TGTTACGAGGACCCGGAGCCTCAGTGCCTGCAACAAGCGGGTGGGCATGTACTTAGAGGGCT<br/> TCGATCCTTTCAATCAGTCAACATTTAACAACGTGGTGGAGCAGAACTTTAAGAACC GCGAG<br/> AGCTACCCAGAGGACACGGTGTCTACATCCCTGAAGATCACAAGCCTGGCACTTTCCCAA<br/> AGCTCTACCAATGGCAGTTTCTCCCCCTCGGGGAATAACGGCTCTGTGAATGGAGGACGG<br/> GAAGCTTCCACGGCCCTGGCCACATCAGCCTCAGGAGGAAAAACAGTAGCAGCAGCCCAA<br/> GGAACCTGAAGAGACGCAATTCTTCCAGCTCCATGAGCAGCCGCTGAGCATCTACGACAACG<br/> TGCCGGGCTCCATCCTCTACTCCAGTTCAGGGGACCTGGCGGATCTGGAGAACGAGGACATC<br/> TTCCCCGAGCTGGACGACATCCTCTACCACGTGAAGGGGATGCAGCGGATAGTCAATCAGTG<br/> GTCGGAGAAGTTTTCTGATGAGGGAGATTTCGGACTCAGCCCTGGACTCGGTCTCTCCCTGCC<br/> CGTCTCTCCAAAACAGATACACCTGGATGTGGACAACGACCCGAACCCAGCAGCAGCAGCTG<br/> GACAGCAGGCAACTCCCTGAATGAACCGAAGAGCCCTCCGAGATCCCGGAAAGAAGGG<br/> ATTCTGGGGTTGGGGCTTCCCTAACCAGGTCCAACAGGCACCGACTGAGATGGCAGATTTCC<br/> CAGAGCTCACATCGGCCAAGCCTCAACTCTGTATCACTACAGATTAAGTCCAGTCTGTGGCC<br/> CAGATGAACCTGCTGCAGAAATACTCACTCCTAAAGCTAACGGCCCTGCTGGAGAAATACAC<br/> ACCTTCTAACAAGCATGGTTTTAGCTGGGCCGTGCCAAGTTCATGAAGAGGATCAAGGTTCC<br/> AGACTACAAGGACCGGAGTGTGTTTGGGGTCCCAGTACGGTCAACGTGCAGCGCACAGGA<br/> CAACCGTTGCCTCAGAGCATCCAGCAGGCCATCGCATACCTCCGGAACCTGTTGGATCAG<br/> GTTGGGCTCTTCAGAAAATCGGGGTCAAGTCCCGGATTGAGGCTCTGCGCGATGATGAATGA<br/> AGGTGCCATAGACTGTGTCAACTACGAAGGACAGTCTGCTTATGACGTGGCAGACATGCTGA<br/> AGCAGTATTTTCGAGATCTTCTGAGCCACTAATGACGAACAACTCTCGGAAACCTTTCTAC<br/> AGATCTACCAATATGTGCCAAGGACCAAGCGCCTGCAGGCCATCAAGGCTGCCATCATGCTGC<br/> TGCTGACGAGAACCGGGAGGTTCTGCAGACCCTGCTTTATTTCTGAGCGATGTCACAGCA<br/> GCCGTAAGAAAACAGATGACCCAACTGACCCCTGCGGTGTGCTTAGCGCTTCCCTCTT<br/> CCATCTCAACACCTGAAGAGAGAGAATTCCTCTCCAGGGTAATGCAAAGAAAACAAGTT<br/> TGGGCAAACCAGATCAGAAAGATTTGAATGAAAACCTAGCTGCCACTCAAGGGCTGGCCCAT<br/> ATGATCGCCGAGTGCAAGAAGCTTTTCCAGGTTCCCGAGGAAATGAGCCGATGTCGTAATTCC<br/> TATACCGAACAAGAGCTGAAGCCCCCTCACTCTGGAAGCACTCGGGCACCTGGGTAATGATGA<br/> CTCAGCTGACTACCAACACTTCCCTCCAGGACTGTGTGGATGGCCTGTTAAAGAAGTCAAAG<br/> AGAAGTTAAAGGCTGGGTCAAGTACTCCACTTCGAGCAGGCTGAGCTGCTTCCATAAGAAG<br/> GTGAGCGAAGGACCCCCCTGAGGCTTTGGAGGTCAGTCATTGAAGTCCCTGCTGTGCCAGA<br/> GGAAATCTTAAAGCGCCTACTTAAAGAACAGCACCTCTGGGATGTAGACCTGTTGGATTCAA<br/> AGTGATCGAAATCTGGACAGCCAACTGAAATTTACCAGTATGTCCAAAACAGTATGGCACC<br/> TCATCCTGCTCGAGACTACGTTGTTTAAAGAACCTGGAGGACTAATTTACCCAAAGGAGCCTG<br/> TGCCCTTTTACTAACCTCTGTGGATCAGATCGCGCACCTGTGGTGGGTGAGGGTTAATGTG<br/> GCTCTGTCCAGGTATTTGATTGAACCCCTGTGGCCAGGAAAATCCAAACTCACCTATATGTG<br/> CAGATTTGACTTAAAGGGCCACATGCCAGAATGGTACACAAAATCTTTTGGACATTTGTGTGC<br/> AGCTGAAGTTGTAAAGATCCGGGATTCCTTCAGTAACCAGAACACTGAAACCAAAGACACCA<br/> AATCTAGGTGA</p> |

**Supplementary Table 4. siRNA interference sequences of TMEM106C and CENPM.**

| <b>TMEM106C</b> | <b>Start</b> | <b>Sequence</b>                     |
|-----------------|--------------|-------------------------------------|
|                 | 891          | GAGAGCACAGCAUAUGUUC <sup>dTdT</sup> |
| <b>CENPM</b>    | <b>Start</b> | <b>Sequence</b>                     |
|                 | 607          | GGAUGUCCAGUCAGGGCUU <sup>dTdT</sup> |
