# Supplementary material for: TMEM106C contributes to the malignant characteristics and poor prognosis of hepatocellular carcinoma
Source: Aging (Albany NY). 2021 Feb 11;13(4):5585–606. doi: 10.18632/aging.202487 (PMC7950261; doi:10.18632/aging.202487)
Supplement: Supplementary Table 1 [file aging-13-202487-s002.xlsx]

## Sheet: Sheet1
Supplementary Table 1. TMEM106C expression related genes.
Query	Statistic	P-value	FDR (BH)	Event_SD	Event_TD
ZC3H13	-0.472393	5.0881e-22	9.21502e-20	371	371		Green area stands for TMEM106C negatively related genes
DLC1	-0.460198	7.62322e-21	1.20532e-18	371	371
GALNTL2	-0.456516	1.69015e-20	2.57032e-18	371	371		Red area stands for TMEM106C positively related genes
RANBP3L	-0.432987	2.19452e-18	2.44241e-16	371	329
PDE2A	-0.432877	2.24304e-18	2.48254e-16	371	371
VPS36	-0.432581	2.37887e-18	2.58972e-16	371	371
FNDC3A	-0.430918	3.30687e-18	3.56105e-16	371	371
NDEL1	-0.429586	4.29966e-18	4.53216e-16	371	371
PALM2-AKAP2	-0.429301	4.54725e-18	4.76791e-16	371	371
FOXO1	-0.427375	6.63086e-18	6.77436e-16	371	371
FBXO8	-0.425597	9.37234e-18	9.43009e-16	371	371
SNRK	-0.421631	2.01337e-17	1.9377e-15	371	371
TGFBR2	-0.420114	2.69048e-17	2.47004e-15	371	371
KIAA1737	-0.419863	2.82191e-17	2.57881e-15	371	371
MEIS3P1	-0.415557	6.36936e-17	5.54106e-15	371	371
COL25A1	-0.412824	1.06129e-16	8.95887e-15	371	266
CDC37L1	-0.41279	1.06802e-16	8.9777e-15	371	371
LATS2	-0.401477	8.41534e-16	6.23236e-14	371	371
LDB2	-0.401026	9.12267e-16	6.73118e-14	371	371
C5orf36	-0.400317	1.03541e-15	7.55587e-14	371	368
PPAP2B	-0.39868	1.38536e-15	9.85687e-14	371	371
AK3	-0.398353	1.46796e-15	1.04014e-13	371	371
KIAA0564	-0.396597	2.00195e-15	1.3994e-13	371	371
IL1R1	-0.396359	2.08735e-15	1.45399e-13	371	371
TXNIP	-0.395813	2.29768e-15	1.58939e-13	371	371
PTPRB	-0.394869	2.71152e-15	1.85632e-13	371	371
INS-IGF2	-0.394649	2.81758e-15	1.91576e-13	371	275
STARD13	-0.393447	3.47589e-15	2.32372e-13	371	371
EPAS1	-0.393366	3.52532e-15	2.34105e-13	371	371
SIK2	-0.392448	4.13519e-15	2.72785e-13	371	371
USP53	-0.389976	6.34048e-15	4.10114e-13	371	371
RORA	-0.38886	7.68134e-15	4.9205e-13	371	371
DNASE1L3	-0.386754	1.1009e-14	6.95299e-13	371	370
GABARAPL1	-0.386635	1.12355e-14	7.05997e-13	371	371
COL4A3BP	-0.385109	1.45594e-14	8.97994e-13	371	371
PTPRN2	-0.385067	1.46628e-14	9.01584e-13	371	371
KIAA1370	-0.384422	1.63514e-14	9.99243e-13	371	371
TIMP3	-0.383942	1.77314e-14	1.07369e-12	371	371
COBLL1	-0.382513	2.25536e-14	1.34123e-12	371	371
CHD9	-0.38018	3.33148e-14	1.9182e-12	371	371
CPEB3	-0.379961	3.45512e-14	1.97796e-12	371	371
NAALADL2	-0.378529	4.38236e-14	2.48026e-12	371	366
CBR4	-0.377952	4.82122e-14	2.71323e-12	371	371
CD302	-0.377799	4.94403e-14	2.77451e-12	371	371
NPY1R	-0.377512	5.18426e-14	2.88867e-12	371	366
SH3D19	-0.375992	6.65757e-14	3.64374e-12	371	371
KLHDC1	-0.375849	6.81624e-14	3.70009e-12	371	368
DAAM1	-0.375794	6.87733e-14	3.7231e-12	371	371
NRBF2	-0.375658	7.03258e-14	3.79683e-12	371	371
FILIP1L	-0.374811	8.07829e-14	4.33789e-12	371	371
AUH	-0.374066	9.12406e-14	4.87318e-12	371	371
RAPGEF2	-0.373939	9.31475e-14	4.96173e-12	371	371
PTPN21	-0.373497	1.00094e-13	5.30336e-12	371	371
STEAP4	-0.372791	1.12265e-13	5.90118e-12	371	370
ABCA9	-0.371548	1.37324e-13	7.14298e-12	371	370
TAL1	-0.371451	1.39495e-13	7.23704e-12	371	371
TMEM100	-0.370603	1.59946e-13	8.25506e-12	371	357
OSBPL11	-0.370287	1.68299e-13	8.66368e-12	371	371
ARHGEF12	-0.370162	1.71712e-13	8.81661e-12	371	371
SERINC1	-0.369989	1.76559e-13	9.01897e-12	371	371
FAM82A1	-0.369905	1.78952e-13	9.11783e-12	371	371
RBL2	-0.369716	1.8449e-13	9.37602e-12	371	371
SDPR	-0.3695	1.90973e-13	9.68084e-12	371	371
MYD88	-0.369215	1.99913e-13	1.00827e-11	371	371
AKAP11	-0.369177	2.01156e-13	1.01198e-11	371	371
S1PR1	-0.367593	2.59109e-13	1.28248e-11	371	371
MMAA	-0.367387	2.67765e-13	1.3204e-11	371	371
SLC35A5	-0.366165	3.25185e-13	1.58008e-11	371	371
OSBP	-0.365478	3.62614e-13	1.75766e-11	371	371
ADH4	-0.365272	3.74614e-13	1.80703e-11	371	371
DAAM2	-0.36511	3.84328e-13	1.84941e-11	371	371
CDH5	-0.364478	4.2466e-13	2.03367e-11	371	371
USP38	-0.363864	4.67816e-13	2.21901e-11	371	371
ANKRD50	-0.363693	4.80529e-13	2.27389e-11	371	371
UBR3	-0.363663	4.82799e-13	2.27922e-11	371	371
HBP1	-0.363584	4.88839e-13	2.29685e-11	371	371
CDADC1	-0.363559	4.90771e-13	2.3005e-11	371	371
JMY	-0.363315	5.09967e-13	2.38487e-11	371	371
FAM122A	-0.362985	5.37092e-13	2.49416e-11	371	371
BTNL9	-0.361737	6.52969e-13	3.00199e-11	371	371
KDR	-0.361483	6.79443e-13	3.09745e-11	371	371
ASTN1	-0.36117	7.13404e-13	3.24485e-11	371	339
DIXDC1	-0.360908	7.43146e-13	3.36476e-11	371	371
ST6GALNAC3	-0.360664	7.71929e-13	3.47729e-11	371	371
ROBO4	-0.360573	7.82926e-13	3.51294e-11	371	371
LRCH1	-0.358691	1.04841e-12	4.63112e-11	371	371
FARP2	-0.358535	1.07388e-12	4.72268e-11	371	371
IL1RL1	-0.358137	1.14204e-12	4.9785e-11	371	324
CYB5D1	-0.358121	1.1449e-12	4.98006e-11	371	371
FEM1C	-0.356673	1.43052e-12	6.11563e-11	371	371
EDNRB	-0.355961	1.59553e-12	6.76303e-11	371	371
LOC399959	-0.355932	1.60263e-12	6.77867e-11	371	371
LST-3TM12	-0.355902	1.61011e-12	6.7959e-11	371	238
FAM107A	-0.353555	2.3026e-12	9.5759e-11	371	371
CDC14B	-0.35339	2.36081e-12	9.77796e-11	371	371
GPM6A	-0.353096	2.46859e-12	1.0161e-10	371	345
GPR116	-0.352846	2.56391e-12	1.05316e-10	371	371
ITGA1	-0.352789	2.58613e-12	1.0601e-10	371	371
SDHD	-0.352673	2.63187e-12	1.07664e-10	371	371
AOC3	-0.352105	2.86808e-12	1.16846e-10	371	371
DENND4A	-0.351666	3.06432e-12	1.24333e-10	371	371
LMO7	-0.351553	3.1172e-12	1.26221e-10	371	371
GNA14	-0.351122	3.32641e-12	1.33876e-10	371	369
SECISBP2L	-0.351003	3.38629e-12	1.36012e-10	371	371
CRBN	-0.350883	3.44786e-12	1.38206e-10	371	371
NCOA4	-0.350741	3.5224e-12	1.40628e-10	371	371
C12orf35	-0.350426	3.69295e-12	1.46556e-10	371	371
NLRP6	-0.350363	3.72821e-12	1.47661e-10	371	359
LARP1B	-0.35011	3.87214e-12	1.52151e-10	371	371
WWC2	-0.3499	3.99624e-12	1.56411e-10	371	371
FBXL3	-0.349782	4.06735e-12	1.58882e-10	371	371
ERG	-0.349331	4.35176e-12	1.68341e-10	371	371
UFM1	-0.349267	4.39347e-12	1.69297e-10	371	371
KLHL2	-0.349161	4.46352e-12	1.71664e-10	371	371
CD300LG	-0.348715	4.77135e-12	1.8037e-10	371	342
PPAPDC2	-0.348556	4.88579e-12	1.83998e-10	371	371
RNF125	-0.348543	4.89534e-12	1.84009e-10	371	371
ADRA1A	-0.348267	5.10094e-12	1.91017e-10	371	349
ELFN1	-0.347966	5.33443e-12	1.9864e-10	371	371
STARD5	-0.347909	5.3797e-12	1.99209e-10	371	371
TBRG1	-0.347844	5.43205e-12	2.00774e-10	371	371
TSC22D1	-0.347479	5.73515e-12	2.11193e-10	371	371
SHROOM4	-0.347418	5.78731e-12	2.12721e-10	371	371
KLHL15	-0.347343	5.85257e-12	2.14724e-10	371	371
ITPRIP	-0.347259	5.92577e-12	2.17009e-10	371	371
DRD1	-0.34717	6.00503e-12	2.19509e-10	371	305
ADAMTS1	-0.347052	6.11103e-12	2.22974e-10	371	371
ZNF330	-0.34651	6.62199e-12	2.40736e-10	371	371
LRRTM2	-0.346393	6.73786e-12	2.44058e-10	371	329
CYB5D2	-0.346216	6.91639e-12	2.50069e-10	371	371
DHRS12	-0.346161	6.97294e-12	2.51311e-10	371	371
C5orf41	-0.345846	7.30523e-12	2.61283e-10	371	371
PJA2	-0.344244	9.2494e-12	3.26135e-10	371	371
SCARF1	-0.344058	9.50548e-12	3.34573e-10	371	371
MBLAC2	-0.343511	1.02999e-11	3.58105e-10	371	370
LOC642597	-0.343125	1.08982e-11	3.76282e-10	371	234
PEX13	-0.342787	1.14497e-11	3.93955e-10	371	371
ALAD	-0.342689	1.16162e-11	3.98997e-10	371	371
ACAD11	-0.342612	1.17461e-11	4.02764e-10	371	371
SSFA2	-0.341979	1.2883e-11	4.38727e-10	371	371
ABCC9	-0.34148	1.3853e-11	4.67295e-10	371	371
MCCC2	-0.341152	1.45307e-11	4.88163e-10	371	371
SAV1	-0.340937	1.49912e-11	5.01942e-10	371	371
ZCCHC24	-0.34074	1.54263e-11	5.15643e-10	371	371
SMARCA2	-0.340678	1.55647e-11	5.19398e-10	371	371
KBTBD11	-0.339671	1.8009e-11	5.93998e-10	371	370
KLHL24	-0.339494	1.84747e-11	6.08352e-10	371	371
MAGI1	-0.339175	1.93442e-11	6.34884e-10	371	371
ALS2CR8	-0.33895	1.99825e-11	6.54755e-10	371	371
SEC62	-0.338789	2.04512e-11	6.67916e-10	371	371
C4orf29	-0.338622	2.09488e-11	6.8231e-10	371	371
SBDS	-0.338468	2.14181e-11	6.94936e-10	371	371
KLHDC2	-0.337674	2.40068e-11	7.71316e-10	371	371
RCBTB2	-0.337581	2.43294e-11	7.79244e-10	371	371
MYST4	-0.337427	2.48714e-11	7.94051e-10	371	371
PLIN1	-0.336773	2.73136e-11	8.60983e-10	371	371
MYO9A	-0.336545	2.82188e-11	8.88112e-10	371	370
RHOB	-0.33606	3.02445e-11	9.48868e-10	371	371
FAT4	-0.335923	3.08375e-11	9.64435e-10	371	368
MMRN2	-0.335585	3.23595e-11	1.00887e-09	371	371
FBXW7	-0.335557	3.24884e-11	1.0113e-09	371	371
SRPR	-0.335443	3.30239e-11	1.02477e-09	371	371
FLT1	-0.33505	3.49192e-11	1.07521e-09	371	371
ZMAT1	-0.334944	3.54515e-11	1.08992e-09	371	371
EFHA2	-0.334896	3.56911e-11	1.09559e-09	371	371
ADH1B	-0.33471	3.66497e-11	1.12156e-09	371	371
C11orf71	-0.33455	3.74888e-11	1.14372e-09	371	371
PRMT10	-0.334112	3.98934e-11	1.206e-09	371	371
SYNJ2BP	-0.333991	4.05808e-11	1.22323e-09	371	371
NHEDC2	-0.333974	4.06798e-11	1.2242e-09	371	371
VIPR1	-0.333758	4.19414e-11	1.25648e-09	371	370
PPAP2A	-0.333603	4.28714e-11	1.28049e-09	371	371
PCDHGB7	-0.333489	4.35677e-11	1.29353e-09	371	351
AASDHPPT	-0.332823	4.78619e-11	1.41891e-09	371	371
TEK	-0.332445	5.04779e-11	1.48981e-09	371	371
GOLGA5	-0.332397	5.08238e-11	1.4978e-09	371	371
SYNPO2	-0.33206	5.32868e-11	1.56575e-09	371	371
C9orf102	-0.331773	5.54813e-11	1.62544e-09	371	371
GIMAP8	-0.331518	5.75068e-11	1.67738e-09	371	371
PEAR1	-0.330826	6.33568e-11	1.82993e-09	371	371
EEF2	-0.329798	7.31484e-11	2.07587e-09	371	371
PCDHB14	-0.329486	7.6396e-11	2.16495e-09	371	371
RCL1	-0.32943	7.69952e-11	2.17883e-09	371	371
RUNX1T1	-0.328912	8.27467e-11	2.32836e-09	371	315
TK2	-0.328867	8.32632e-11	2.33959e-09	371	371
CSRNP1	-0.328689	8.53457e-11	2.39473e-09	371	371
IRAK3	-0.328577	8.66845e-11	2.42546e-09	371	371
BAZ2B	-0.328447	8.82614e-11	2.46612e-09	371	371
CAMTA2	-0.328247	9.07474e-11	2.52849e-09	371	371
PCF11	-0.328118	9.23823e-11	2.56686e-09	371	371
ZRANB1	-0.328082	9.28506e-11	2.57628e-09	371	371
PDK4	-0.327944	9.46386e-11	2.62224e-09	371	371
PCYOX1	-0.327794	9.6623e-11	2.6698e-09	371	371
DUSP1	-0.327766	9.70086e-11	2.67674e-09	371	371
HERC4	-0.3276	9.92509e-11	2.72728e-09	371	371
C10orf26	-0.326708	1.12271e-10	3.05554e-09	371	371
AKAP13	-0.326592	1.14076e-10	3.09621e-09	371	371
MYCBP2	-0.326194	1.20501e-10	3.26172e-09	371	371
BMX	-0.325608	1.30622e-10	3.49766e-09	371	350
C13orf15	-0.324609	1.49786e-10	3.98402e-09	371	371
SPRY1	-0.324423	1.53641e-10	4.07568e-09	371	371
COX18	-0.324268	1.56926e-10	4.1573e-09	371	371
ATOH8	-0.324143	1.59632e-10	4.22335e-09	371	371
MTMR6	-0.323601	1.7189e-10	4.52364e-09	371	371
HS3ST3B1	-0.3235	1.74268e-10	4.58018e-09	371	367
EMP1	-0.323459	1.75264e-10	4.60027e-09	371	371
SRL	-0.323444	1.75614e-10	4.60339e-09	371	369
ENG	-0.32295	1.87837e-10	4.87885e-09	371	371
GADD45B	-0.322571	1.97745e-10	5.12286e-09	371	371
MMADHC	-0.322251	2.06531e-10	5.31591e-09	371	371
OTUD4	-0.322005	2.13546e-10	5.48937e-09	371	371
TECPR2	-0.321886	2.17005e-10	5.57109e-09	371	371
KIAA1109	-0.321643	2.24264e-10	5.74788e-09	371	371
ATG2B	-0.321461	2.29844e-10	5.87798e-09	371	371
SEC24B	-0.321322	2.34212e-10	5.98202e-09	371	371
DST	-0.321134	2.40241e-10	6.12813e-09	371	371
LOC338758	-0.321014	2.44187e-10	6.22085e-09	371	371
TMEM233	-0.320995	2.44793e-10	6.22832e-09	371	360
ESR1	-0.320782	2.51943e-10	6.40205e-09	371	369
ATXN3	-0.320438	2.63903e-10	6.68041e-09	371	371
USP47	-0.319603	2.9528e-10	7.40877e-09	371	371
PDZD2	-0.319528	2.98253e-10	7.47396e-09	371	371
PTPRG	-0.319512	2.98891e-10	7.48053e-09	371	371
KIAA1432	-0.319273	3.08634e-10	7.71469e-09	371	371
RANBP6	-0.318876	3.25534e-10	8.10661e-09	371	371
UTP14C	-0.317829	3.74462e-10	9.22447e-09	371	371
BCKDHB	-0.317826	3.74591e-10	9.22447e-09	371	371
TECTA	-0.317504	3.91029e-10	9.60553e-09	371	360
FMO2	-0.3173	4.01788e-10	9.83343e-09	371	369
DICER1	-0.317254	4.04264e-10	9.86978e-09	371	371
TRPM7	-0.317066	4.14511e-10	1.00706e-08	371	371
UBR2	-0.316969	4.19899e-10	1.01643e-08	371	371
ECM2	-0.316926	4.22284e-10	1.01973e-08	371	371
THAP9	-0.316868	4.25595e-10	1.02648e-08	371	371
HS3ST3A1	-0.316819	4.28358e-10	1.03032e-08	371	370
SLC38A2	-0.316813	4.28724e-10	1.03032e-08	371	371
SH3BP5	-0.316812	4.28741e-10	1.03032e-08	371	371
RPS6KA2	-0.316738	4.33019e-10	1.03677e-08	371	371
CBFA2T3	-0.316649	4.38139e-10	1.0466e-08	371	371
SPARCL1	-0.316402	4.52772e-10	1.07896e-08	371	371
FAM13C	-0.316162	4.67402e-10	1.11117e-08	371	364
MYLK	-0.316137	4.68936e-10	1.11349e-08	371	371
CCDC146	-0.315952	4.80636e-10	1.1372e-08	371	371
VWF	-0.315898	4.84038e-10	1.14389e-08	371	371
JMJD1C	-0.315785	4.9137e-10	1.15847e-08	371	371
DUSP16	-0.315766	4.92567e-10	1.15992e-08	371	371
TMEM150C	-0.315645	5.00553e-10	1.17595e-08	371	370
TMEM88	-0.315583	5.04647e-10	1.18417e-08	371	371
HECTD1	-0.31548	5.11612e-10	1.19628e-08	371	371
SUCLA2	-0.315417	5.15866e-10	1.20482e-08	371	371
ZADH2	-0.315192	5.31446e-10	1.2383e-08	371	371
MCEE	-0.315106	5.37567e-10	1.24964e-08	371	371
NOTCH4	-0.314771	5.61877e-10	1.30334e-08	371	371
RBM7	-0.314747	5.63624e-10	1.30564e-08	371	371
MPDZ	-0.314528	5.8015e-10	1.34081e-08	371	371
SOX7	-0.314504	5.81947e-10	1.3434e-08	371	371
MXI1	-0.314404	5.89736e-10	1.35808e-08	371	371
EMCN	-0.314396	5.90352e-10	1.35808e-08	371	371
KTELC1	-0.314371	5.92279e-10	1.36094e-08	371	371
SUGT1L1	-0.314095	6.14209e-10	1.40971e-08	371	371
RBMS1	-0.313893	6.30769e-10	1.44439e-08	371	371
ARIH1	-0.313736	6.43878e-10	1.47251e-08	371	371
N4BP2L1	-0.313663	6.50062e-10	1.48345e-08	371	371
SHOC2	-0.313563	6.58679e-10	1.4999e-08	371	371
DBT	-0.3134	6.72956e-10	1.52695e-08	371	371
CLMN	-0.312633	7.44104e-10	1.67503e-08	371	371
TLE4	-0.312379	7.69297e-10	1.72784e-08	371	371
FTO	-0.312094	7.98467e-10	1.7833e-08	371	371
BMPER	-0.31188	8.21092e-10	1.82769e-08	371	333
CYR61	-0.311844	8.2499e-10	1.83287e-08	371	371
EPM2AIP1	-0.311756	8.34531e-10	1.8514e-08	371	371
MYCT1	-0.311553	8.56903e-10	1.8947e-08	371	371
NR3C2	-0.311399	8.74218e-10	1.92444e-08	371	371
RB1	-0.31132	8.83283e-10	1.94225e-08	371	371
SLCO2A1	-0.311231	8.93548e-10	1.96265e-08	371	371
CLK1	-0.311205	8.96626e-10	1.96724e-08	371	371
TSC22D2	-0.311106	9.08231e-10	1.99051e-08	371	371
HERC3	-0.311	9.20869e-10	2.00937e-08	371	371
TNKS2	-0.310975	9.23843e-10	2.01365e-08	371	371
CTSO	-0.310893	9.33778e-10	2.03308e-08	371	371
FYN	-0.310531	9.78706e-10	2.12394e-08	371	371
TERF2IP	-0.310515	9.80814e-10	2.1262e-08	371	371
KLF9	-0.31049	9.83927e-10	2.13063e-08	371	371
ETFDH	-0.31004	1.04307e-09	2.24648e-08	371	371
TMEM192	-0.309987	1.05031e-09	2.25719e-08	371	371
AASS	-0.309973	1.05226e-09	2.25895e-08	371	370
EPM2A	-0.309917	1.05993e-09	2.27054e-08	371	371
APOLD1	-0.309828	1.07216e-09	2.29013e-08	371	371
HSD17B4	-0.309613	1.10243e-09	2.34643e-08	371	371
TIE1	-0.309562	1.10969e-09	2.35937e-08	371	371
ZBTB38	-0.309431	1.12877e-09	2.39737e-08	371	371
UBL3	-0.309263	1.15347e-09	2.44382e-08	371	371
PCDHB4	-0.309258	1.15432e-09	2.44382e-08	371	361
ADRA1B	-0.309229	1.15864e-09	2.44862e-08	371	371
ACYP2	-0.309226	1.15905e-09	2.44862e-08	371	371
SORL1	-0.309117	1.17545e-09	2.47803e-08	371	371
SACM1L	-0.308733	1.23528e-09	2.59865e-08	371	371
PEX11A	-0.308627	1.25214e-09	2.62581e-08	371	371
PHLDA1	-0.308493	1.27411e-09	2.66627e-08	371	371
PIK3R1	-0.308434	1.28374e-09	2.6836e-08	371	371
RBMS3	-0.308403	1.28896e-09	2.69169e-08	371	359
GTF2IRD2P1	-0.30816	1.32989e-09	2.76268e-08	371	371
LIN7C	-0.307938	1.36835e-09	2.83372e-08	371	371
ZEB1	-0.307617	1.42599e-09	2.93781e-08	371	371
C7orf58	-0.307289	1.48729e-09	3.05778e-08	371	371
LIPE	-0.307058	1.53215e-09	3.14132e-08	371	370
FAM8A1	-0.307055	1.53266e-09	3.14132e-08	371	371
LONP2	-0.307001	1.5433e-09	3.15989e-08	371	371
EXOC3L2	-0.306515	1.6424e-09	3.34218e-08	371	371
THSD1	-0.306405	1.66574e-09	3.3862e-08	371	371
CLPX	-0.306256	1.69779e-09	3.44083e-08	371	371
TCF4	-0.306212	1.70723e-09	3.45645e-08	371	371
CDC14C	-0.306193	1.71153e-09	3.45902e-08	371	350
C14orf4	-0.306191	1.71197e-09	3.45902e-08	371	371
PRKCH	-0.306172	1.71613e-09	3.4639e-08	371	371
LOC401093	-0.306073	1.73788e-09	3.49717e-08	371	370
CYYR1	-0.306022	1.74928e-09	3.51479e-08	371	371
MYO10	-0.306008	1.75238e-09	3.5157e-08	371	371
PCDHGB2	-0.305584	1.84985e-09	3.70008e-08	371	354
C1orf101	-0.305497	1.8704e-09	3.73742e-08	371	366
SPTBN1	-0.305396	1.89463e-09	3.78204e-08	371	371
UBE2H	-0.305334	1.90959e-09	3.8081e-08	371	371
ASPA	-0.305224	1.93659e-09	3.85703e-08	371	365
ZNF295	-0.305122	1.96179e-09	3.90011e-08	371	371
ZNF776	-0.305094	1.96881e-09	3.90601e-08	371	371
OAT	-0.305088	1.97045e-09	3.90601e-08	371	371
TNRC6B	-0.304606	2.09502e-09	4.11608e-08	371	371
C5orf33	-0.304571	2.10419e-09	4.13001e-08	371	371
TADA2B	-0.304549	2.11007e-09	4.13748e-08	371	371
MIA3	-0.304352	2.16358e-09	4.23314e-08	371	371
AFF4	-0.304346	2.16523e-09	4.23314e-08	371	371
FLT4	-0.303929	2.28283e-09	4.4543e-08	371	371
KCNAB1	-0.303712	2.34633e-09	4.56538e-08	371	371
THBD	-0.303711	2.34663e-09	4.56538e-08	371	371
EPC2	-0.303666	2.36001e-09	4.58693e-08	371	371
NRIP1	-0.303308	2.4695e-09	4.78109e-08	371	371
TSTD2	-0.303279	2.47843e-09	4.78906e-08	371	371
CLEC3B	-0.303236	2.49205e-09	4.81061e-08	371	371
USP25	-0.30315	2.51908e-09	4.85349e-08	371	371
GUCY1A2	-0.303125	2.52724e-09	4.8645e-08	371	367
ETS1	-0.302983	2.57285e-09	4.93323e-08	371	371
ADARB1	-0.302961	2.5799e-09	4.94201e-08	371	371
DNAJB9	-0.302906	2.59788e-09	4.97165e-08	371	371
GDF7	-0.302839	2.62007e-09	5.00931e-08	371	313
CA4	-0.302807	2.63062e-09	5.02466e-08	371	308
TMEM204	-0.302757	2.64729e-09	5.05165e-08	371	371
CCDC85A	-0.302601	2.69997e-09	5.14233e-08	371	369
SLC25A15	-0.302452	2.75102e-09	5.23455e-08	371	371
PCDHB15	-0.302366	2.78094e-09	5.28644e-08	371	365
CRHBP	-0.302301	2.80385e-09	5.3163e-08	371	367
FAM179B	-0.302227	2.82998e-09	5.35412e-08	371	371
RAB2B	-0.302136	2.86256e-09	5.41062e-08	371	371
TAPT1	-0.30207	2.8865e-09	5.43525e-08	371	371
GRINL1A	-0.302028	2.90184e-09	5.45897e-08	371	371
ELTD1	-0.301959	2.92706e-09	5.50122e-08	371	371
LYSMD3	-0.301896	2.95053e-09	5.5401e-08	371	371
LMOD1	-0.301811	2.98226e-09	5.5944e-08	371	371
BMPR2	-0.301389	3.14421e-09	5.89266e-08	371	371
BNIP2	-0.301291	3.18311e-09	5.95995e-08	371	371
LDLR	-0.301124	3.25079e-09	6.07526e-08	371	371
FAM108B1	-0.300987	3.30673e-09	6.17323e-08	371	371
SIRT1	-0.300907	3.34015e-09	6.22474e-08	371	371
PCDHGC3	-0.300767	3.39934e-09	6.32321e-08	371	371
KLHL28	-0.30075	3.40648e-09	6.33059e-08	371	371
GTF2IRD2B	-0.300674	3.43928e-09	6.38558e-08	371	371
EPB41L5	-0.300594	3.47351e-09	6.44178e-08	371	371
SLC20A2	-0.300589	3.47601e-09	6.44178e-08	371	371
TXK	-0.300464	3.53078e-09	6.53113e-08	371	365
NTF3	-0.300387	3.5647e-09	6.58776e-08	371	349
MBTPS1	-0.300326	3.59221e-09	6.62787e-08	371	371
SNED1	-0.300324	3.59306e-09	6.62787e-08	371	371
SLCO1B3	-0.300275	3.61503e-09	6.66222e-08	371	331
NMD3	-0.300177	3.65967e-09	6.73827e-08	371	371
YAP1	-0.300158	3.66843e-09	6.74192e-08	371	371
FBXL5	-0.299871	3.80211e-09	6.96192e-08	371	371
LOC100129387	-0.299781	3.84495e-09	7.03389e-08	371	371
LARP7	-0.299638	3.91407e-09	7.15377e-08	371	371
CLK4	-0.29961	3.92796e-09	7.16391e-08	371	371
FOXC1	-0.299364	4.04987e-09	7.36818e-08	371	371
ARID4A	-0.299243	4.11167e-09	7.46017e-08	371	371
CYP2E1	-0.298926	4.27659e-09	7.73827e-08	371	371
SULT1B1	-0.298836	4.32476e-09	7.81123e-08	371	360
SLC1A2	-0.298748	4.37241e-09	7.88301e-08	371	371
CCL14	-0.298641	4.43086e-09	7.97525e-08	371	371
HIVEP1	-0.298633	4.43559e-09	7.97525e-08	371	371
MLYCD	-0.29855	4.48127e-09	8.04288e-08	371	371
KIAA2018	-0.298438	4.54382e-09	8.14779e-08	371	371
IKZF5	-0.298046	4.76996e-09	8.53027e-08	371	371
GPR146	-0.297872	4.87403e-09	8.68519e-08	371	371
CLASP1	-0.297816	4.90793e-09	8.73777e-08	371	371
SENP8	-0.297775	4.93298e-09	8.76671e-08	371	371
MORC3	-0.29776	4.94211e-09	8.77511e-08	371	371
CUL5	-0.29763	5.02224e-09	8.89735e-08	371	371
TTC36	-0.297382	5.17841e-09	9.16202e-08	371	354
MTHFD1	-0.297261	5.25653e-09	9.29198e-08	371	371
RGS6	-0.297069	5.38287e-09	9.49845e-08	371	318
FAM188A	-0.296744	5.60319e-09	9.85232e-08	371	371
ANKFY1	-0.296499	5.77483e-09	1.01187e-07	371	371
RND3	-0.296484	5.78526e-09	1.01278e-07	371	371
NFIL3	-0.296449	5.80988e-09	1.01619e-07	371	371
FAM198B	-0.296384	5.85717e-09	1.0235e-07	371	371
DCUN1D3	-0.296377	5.86196e-09	1.0235e-07	371	371
SIDT2	-0.296012	6.13116e-09	1.06584e-07	371	371
AP1G1	-0.29596	6.17026e-09	1.0717e-07	371	371
ZNF366	-0.295851	6.25383e-09	1.08338e-07	371	351
PLAT	-0.295794	6.2979e-09	1.08818e-07	371	371
TPT1	-0.295625	6.42949e-09	1.10995e-07	371	371
LRRC70	-0.295518	6.51472e-09	1.12175e-07	371	371
NR3C1	-0.295467	6.55566e-09	1.12782e-07	371	371
SMAD1	-0.29541	6.60146e-09	1.13374e-07	371	371
RSC1A1	-0.295399	6.61042e-09	1.1343e-07	371	371
SOS2	-0.29538	6.62606e-09	1.13559e-07	371	371
FRMD3	-0.295376	6.6293e-09	1.13559e-07	371	340
DCAF5	-0.29534	6.65813e-09	1.13955e-07	371	371
ZNF462	-0.295324	6.67173e-09	1.14089e-07	371	366
ZNF264	-0.295309	6.6839e-09	1.14199e-07	371	371
TOPORS	-0.294957	6.97842e-09	1.18723e-07	371	371
COG6	-0.294928	7.00333e-09	1.18871e-07	371	371
THSD1P1	-0.294924	7.00646e-09	1.18871e-07	371	371
PPP1R12B	-0.294923	7.00771e-09	1.18871e-07	371	371
TPRG1	-0.294774	7.13579e-09	1.20884e-07	371	369
ARFIP1	-0.294728	7.17685e-09	1.21476e-07	371	371
ELF1	-0.294591	7.29811e-09	1.23214e-07	371	371
CASQ2	-0.294516	7.36532e-09	1.24244e-07	371	362
ZDHHC8	-0.294328	7.536e-09	1.27015e-07	371	371
PGM5	-0.294165	7.68781e-09	1.29246e-07	371	369
KANK1	-0.293795	8.04196e-09	1.34406e-07	371	371
RETSAT	-0.293509	8.32744e-09	1.39061e-07	371	371
GP6	-0.293413	8.42532e-09	1.40577e-07	371	253
TANK	-0.29328	8.56254e-09	1.42747e-07	371	371
RCAN1	-0.293237	8.60725e-09	1.43174e-07	371	371
SOCS2	-0.293228	8.61691e-09	1.43174e-07	371	371
TBCK	-0.293186	8.66099e-09	1.43716e-07	371	371
ZFPM2	-0.293183	8.66395e-09	1.43716e-07	371	368
AHR	-0.293106	8.74592e-09	1.44835e-07	371	371
ZNF136	-0.293047	8.80913e-09	1.45519e-07	371	371
ZBTB16	-0.293025	8.8326e-09	1.45695e-07	371	371
ALKBH8	-0.293023	8.83442e-09	1.45695e-07	371	371
KCTD21	-0.292919	8.9466e-09	1.47423e-07	371	371
STAM2	-0.292908	8.95901e-09	1.47505e-07	371	371
SUN2	-0.292898	8.96959e-09	1.47557e-07	371	371
ZNF791	-0.292889	8.97957e-09	1.476e-07	371	371
NUMB	-0.292773	9.10703e-09	1.49448e-07	371	371
C6orf145	-0.292693	9.19534e-09	1.50526e-07	371	371
PLEKHM3	-0.292666	9.22577e-09	1.50654e-07	371	371
ZNF510	-0.292666	9.22585e-09	1.50654e-07	371	371
ZNF441	-0.292525	9.38481e-09	1.52999e-07	371	371
PER2	-0.29249	9.42495e-09	1.53527e-07	371	371
NR4A2	-0.292346	9.59042e-09	1.56095e-07	371	371
ARL15	-0.292251	9.70235e-09	1.57659e-07	371	371
FBLN5	-0.292225	9.73229e-09	1.58017e-07	371	371
FBXO3	-0.291288	1.09006e-08	1.7584e-07	371	371
BCO2	-0.291122	1.11212e-08	1.79252e-07	371	370
DDX6	-0.291012	1.12692e-08	1.81491e-07	371	371
PANX1	-0.29097	1.13268e-08	1.82271e-07	371	371
SNX19	-0.290635	1.17926e-08	1.8931e-07	371	371
C12orf68	-0.290618	1.18166e-08	1.89542e-07	371	369
OIT3	-0.290514	1.19651e-08	1.91461e-07	371	370
PRKG1	-0.290233	1.23774e-08	1.96951e-07	371	343
SLC6A12	-0.290079	1.26088e-08	2.00313e-07	371	371
SKI	-0.289988	1.27466e-08	2.0218e-07	371	371
CDC42EP3	-0.289949	1.28062e-08	2.02964e-07	371	371
CLEC1A	-0.289796	1.30445e-08	2.06412e-07	371	370
TINAGL1	-0.289677	1.32309e-08	2.0903e-07	371	371
FAM107B	-0.289548	1.34384e-08	2.11972e-07	371	371
JDP2	-0.289286	1.38656e-08	2.18192e-07	371	371
SGK269	-0.289185	1.40345e-08	2.20328e-07	371	371
FERMT2	-0.288876	1.45632e-08	2.27909e-07	371	371
SCN4B	-0.288582	1.50845e-08	2.35697e-07	371	370
RAMP3	-0.288223	1.57455e-08	2.45063e-07	371	371
RRAGA	-0.288048	1.6076e-08	2.49622e-07	371	371
SPRY2	-0.287981	1.62051e-08	2.51431e-07	371	371
LRP2BP	-0.287968	1.62302e-08	2.51625e-07	371	371
COL18A1	-0.287897	1.63684e-08	2.5357e-07	371	371
CYP4V2	-0.287856	1.64485e-08	2.54479e-07	371	371
PANK1	-0.287563	1.70313e-08	2.62411e-07	371	371
HEMGN	-0.287359	1.74503e-08	2.67419e-07	371	146
PNPLA8	-0.287336	1.74971e-08	2.67931e-07	371	371
AGL	-0.287222	1.7736e-08	2.70963e-07	371	371
ATAD1	-0.287166	1.78543e-08	2.72407e-07	371	371
ATXN1L	-0.287165	1.78578e-08	2.72407e-07	371	371
FAM18B	-0.287144	1.79009e-08	2.72774e-07	371	371
SLC12A4	-0.287043	1.8118e-08	2.75742e-07	371	371
TRIP11	-0.286981	1.82508e-08	2.77551e-07	371	371
POR	-0.286926	1.83705e-08	2.79159e-07	371	371
ARCN1	-0.286834	1.85721e-08	2.82007e-07	371	371
C11orf54	-0.286804	1.86384e-08	2.82799e-07	371	371
ASPRV1	-0.286642	1.9001e-08	2.87425e-07	371	371
TLL1	-0.286632	1.90235e-08	2.87447e-07	371	342
SEL1L	-0.286615	1.90612e-08	2.8768e-07	371	371
ANKRD42	-0.286379	1.96023e-08	2.94953e-07	371	371
MUDENG	-0.286337	1.97006e-08	2.96185e-07	371	371
KDM6B	-0.285698	2.12445e-08	3.17029e-07	371	371
ABCA8	-0.2855	2.17474e-08	3.24047e-07	371	368
ZNF561	-0.285239	2.24285e-08	3.33913e-07	371	371
PNRC1	-0.285233	2.2443e-08	3.33913e-07	371	371
NT5DC1	-0.284903	2.33335e-08	3.4587e-07	371	371
NRP2	-0.284826	2.35463e-08	3.48247e-07	371	371
EPHA4	-0.284757	2.37374e-08	3.50553e-07	371	370
TNS3	-0.284522	2.4404e-08	3.59136e-07	371	371
NOSTRIN	-0.28452	2.44087e-08	3.59136e-07	371	371
TTBK2	-0.284401	2.47512e-08	3.63906e-07	371	371
SIK3	-0.284138	2.55293e-08	3.73967e-07	371	371
COG3	-0.28398	2.60066e-08	3.80679e-07	371	371
NPY5R	-0.283917	2.62007e-08	3.82958e-07	371	264
EFCAB6	-0.283559	2.73203e-08	3.98445e-07	371	347
GOLGA4	-0.283549	2.73554e-08	3.98665e-07	371	371
FKBP7	-0.283519	2.74498e-08	3.99748e-07	371	371
HERPUD1	-0.28325	2.83273e-08	4.11624e-07	371	371
C4orf41	-0.283195	2.85112e-08	4.13994e-07	371	371
PDE10A	-0.283065	2.89458e-08	4.19452e-07	371	370
KLF12	-0.283056	2.89762e-08	4.19523e-07	371	371
ZNF175	-0.283032	2.90609e-08	4.20122e-07	371	370
SEC23A	-0.282948	2.93469e-08	4.23046e-07	371	371
RALGAPA1	-0.282883	2.95699e-08	4.25644e-07	371	371
ZFP36	-0.282868	2.96197e-08	4.26054e-07	371	371
PDE7B	-0.282832	2.97455e-08	4.27555e-07	371	371
TRIM4	-0.282759	3.00001e-08	4.30592e-07	371	371
NFIX	-0.282677	3.02899e-08	4.34126e-07	371	371
GPIHBP1	-0.282512	3.08792e-08	4.41619e-07	371	371
LGSN	-0.282401	3.12816e-08	4.46733e-07	371	351
BBS1	-0.282372	3.13853e-08	4.47892e-07	371	371
NFAT5	-0.282324	3.15638e-08	4.49796e-07	371	371
GOLGB1	-0.282251	3.18315e-08	4.52316e-07	371	371
LIFR	-0.282194	3.20448e-08	4.55022e-07	371	371
AG2	-0.281924	3.3067e-08	4.68535e-07	371	371
RDX	-0.281621	3.42518e-08	4.83261e-07	371	371
RNF160	-0.281501	3.47352e-08	4.89041e-07	371	371
KIAA0247	-0.281159	3.61404e-08	5.06678e-07	371	371
MT1X	-0.280985	3.68765e-08	5.1627e-07	371	371
FAM160B1	-0.280961	3.69805e-08	5.17363e-07	371	371
SH3BP4	-0.280848	3.74688e-08	5.2284e-07	371	371
SAMD4A	-0.280846	3.7477e-08	5.2284e-07	371	371
RBM43	-0.280838	3.75094e-08	5.22927e-07	371	371
C20orf132	-0.280634	3.8409e-08	5.3472e-07	371	371
PCNX	-0.280444	3.92629e-08	5.46226e-07	371	371
TCF21	-0.280436	3.92991e-08	5.46348e-07	371	366
SPCS3	-0.280353	3.96746e-08	5.51183e-07	371	371
SYNE2	-0.280303	3.99044e-08	5.53604e-07	371	371
SUCNR1	-0.280233	4.02297e-08	5.57729e-07	371	342
MFSD8	-0.2799	4.1808e-08	5.79206e-07	371	371
CSNK1A1	-0.279782	4.23803e-08	5.86528e-07	371	371
JAM2	-0.279779	4.23954e-08	5.86528e-07	371	370
REV3L	-0.27973	4.26353e-08	5.89438e-07	371	371
FOSB	-0.279455	4.40109e-08	6.06352e-07	371	371
SORBS2	-0.279429	4.41391e-08	6.07699e-07	371	371
C10orf118	-0.279355	4.45203e-08	6.121e-07	371	371
RAB30	-0.279334	4.46287e-08	6.13168e-07	371	371
ACAA1	-0.279154	4.55621e-08	6.2427e-07	371	371
CPEB4	-0.278803	4.74406e-08	6.47781e-07	371	371
C6orf138	-0.278567	4.8741e-08	6.64626e-07	371	349
IRF2	-0.278518	4.90142e-08	6.67894e-07	371	371
LOC285456	-0.278496	4.91394e-08	6.69142e-07	371	224
KPNA1	-0.278391	4.97368e-08	6.75891e-07	371	371
PLA2G12A	-0.278351	4.99676e-08	6.78565e-07	371	371
RANBP2	-0.278301	5.0255e-08	6.82003e-07	371	371
HCG11	-0.27821	5.07799e-08	6.87253e-07	371	370
KIAA0240	-0.27814	5.11914e-08	6.91883e-07	371	371
C9orf82	-0.278127	5.12657e-08	6.92418e-07	371	371
ATM	-0.278049	5.17257e-08	6.97685e-07	371	371
SEPSECS	-0.277948	5.2328e-08	7.04853e-07	371	371
KLHL8	-0.277913	5.25387e-08	7.06939e-07	371	371
DNAJC27	-0.277848	5.29292e-08	7.11508e-07	371	371
CALD1	-0.277819	5.31059e-08	7.13403e-07	371	371
TUBE1	-0.277714	5.37508e-08	7.21579e-07	371	371
CCPG1	-0.277521	5.49448e-08	7.36615e-07	371	371
CDKN2AIP	-0.276972	5.85045e-08	7.79325e-07	371	371
ATMIN	-0.276797	5.96794e-08	7.9368e-07	371	371
AKAP2	-0.27666	6.06221e-08	8.0568e-07	371	346
NDFIP2	-0.276631	6.08206e-08	8.07778e-07	371	371
CIDEB	-0.276613	6.09462e-08	8.08908e-07	371	371
FHL5	-0.276283	6.32831e-08	8.35472e-07	371	339
ACAD8	-0.276149	6.42527e-08	8.47149e-07	371	371
ACAT1	-0.275764	6.71246e-08	8.83261e-07	371	371
SPG20	-0.275724	6.74324e-08	8.8614e-07	371	371
PACRG	-0.275408	6.989e-08	9.16019e-07	371	355
SLC5A4	-0.275379	7.0125e-08	9.18494e-07	371	289
BAI3	-0.275351	7.03432e-08	9.20747e-07	371	260
LOC342346	-0.275254	7.11265e-08	9.30388e-07	371	311
PCDHB12	-0.275052	7.27717e-08	9.46935e-07	371	368
GOLGA2	-0.274998	7.32173e-08	9.52112e-07	371	371
G6PC	-0.27495	7.36112e-08	9.5661e-07	371	371
KAZ	-0.274916	7.38966e-08	9.59692e-07	371	371
NRN1	-0.274843	7.45069e-08	9.66358e-07	371	371
SERPING1	-0.274803	7.48516e-08	9.69754e-07	371	371
CFI	-0.274801	7.48661e-08	9.69754e-07	371	371
TET2	-0.274738	7.54011e-08	9.7605e-07	371	371
GPHN	-0.274672	7.59674e-08	9.82104e-07	371	371
PDGFD	-0.27463	7.63274e-08	9.85479e-07	371	371
CTH	-0.274476	7.76618e-08	1.00076e-06	371	371
ADAMTS15	-0.274432	7.80537e-08	1.00451e-06	371	313
UBR1	-0.274399	7.83415e-08	1.00692e-06	371	371
ZNF799	-0.274273	7.94628e-08	1.02067e-06	371	371
FAM65C	-0.274244	7.97241e-08	1.02271e-06	371	368
SLC23A2	-0.274197	8.0154e-08	1.0269e-06	371	371
RAB6A	-0.27418	8.0308e-08	1.02821e-06	371	371
FAM190B	-0.27408	8.12114e-08	1.03778e-06	371	371
COQ10B	-0.273962	8.23042e-08	1.05107e-06	371	371
PCDHB13	-0.273858	8.32718e-08	1.06138e-06	371	367
ERRFI1	-0.273683	8.49323e-08	1.08116e-06	371	371
EFNB2	-0.273671	8.50499e-08	1.08197e-06	371	371
C8orf4	-0.273607	8.56615e-08	1.08767e-06	371	371
SGPL1	-0.2734	8.76755e-08	1.10876e-06	371	371
LRRC32	-0.273397	8.77126e-08	1.10876e-06	371	371
SPATA18	-0.273261	8.90644e-08	1.12442e-06	371	369
ZBTB43	-0.27303	9.14051e-08	1.15033e-06	371	371
KCNJ8	-0.273019	9.15149e-08	1.15098e-06	371	371
SLC4A1	-0.27291	9.26389e-08	1.16073e-06	371	221
GTF2IRD2	-0.272896	9.27875e-08	1.16186e-06	371	371
DIRAS3	-0.272585	9.60787e-08	1.2008e-06	371	362
C22orf13	-0.272271	9.95253e-08	1.24077e-06	371	371
IQGAP2	-0.272204	1.00266e-07	1.24922e-06	371	371
RRN3	-0.272033	1.02208e-07	1.27024e-06	371	371
HBD	-0.271687	1.06242e-07	1.31791e-06	371	145
ALDH6A1	-0.271658	1.06584e-07	1.32056e-06	371	371
CDK6	-0.271657	1.06596e-07	1.32056e-06	371	371
SFRP1	-0.271652	1.06655e-07	1.32056e-06	371	353
ZNF423	-0.271495	1.08545e-07	1.34229e-06	371	368
CCND1	-0.271479	1.08737e-07	1.34383e-06	371	371
SETD7	-0.271122	1.13151e-07	1.38977e-06	371	371
NHSL2	-0.271047	1.141e-07	1.39969e-06	371	350
TRUB1	-0.271013	1.14533e-07	1.40327e-06	371	371
C2orf42	-0.270952	1.1531e-07	1.41106e-06	371	371
RSF1	-0.270886	1.16166e-07	1.42066e-06	371	371
STRN3	-0.270746	1.17987e-07	1.44205e-06	371	371
CCT6B	-0.270691	1.18708e-07	1.44997e-06	371	369
FILIP1	-0.270624	1.19602e-07	1.4591e-06	371	371
SCP2	-0.27028	1.2426e-07	1.51037e-06	371	371
PREX2	-0.270219	1.25103e-07	1.51878e-06	371	354
GPR182	-0.270128	1.26369e-07	1.53228e-06	371	318
WDR36	-0.270084	1.26999e-07	1.53897e-06	371	371
CEP120	-0.270012	1.28019e-07	1.54945e-06	371	371
FXYD6	-0.269967	1.28652e-07	1.55617e-06	371	371
ZNF521	-0.269937	1.29086e-07	1.56047e-06	371	371
KBTBD7	-0.269895	1.29691e-07	1.56683e-06	371	371
CNOT6L	-0.269738	1.31955e-07	1.59202e-06	371	371
NIPSNAP3B	-0.269556	1.34645e-07	1.61943e-06	371	370
LRP5	-0.269459	1.36098e-07	1.63235e-06	371	371
RGMB	-0.268875	1.45186e-07	1.7299e-06	371	371
IL33	-0.268855	1.45508e-07	1.7327e-06	371	371
GABARAPL3	-0.268768	1.469e-07	1.74719e-06	371	284
IFNGR1	-0.26871	1.47841e-07	1.75733e-06	371	371
PTAR1	-0.268692	1.4815e-07	1.75995e-06	371	371
DLGAP2	-0.268676	1.48396e-07	1.76183e-06	371	213
LOC145820	-0.268373	1.53445e-07	1.81313e-06	371	368
ENPP1	-0.268034	1.59277e-07	1.87869e-06	371	371
PLEKHG1	-0.268002	1.59844e-07	1.88426e-06	371	371
NFE2L2	-0.26799	1.60064e-07	1.88575e-06	371	371
MAP1B	-0.267968	1.60445e-07	1.88911e-06	371	371
C2orf40	-0.267929	1.61135e-07	1.895e-06	371	306
RASGRF2	-0.267803	1.63382e-07	1.91803e-06	371	371
MYOCD	-0.267765	1.64061e-07	1.92389e-06	371	324
NDRG2	-0.267739	1.64543e-07	1.92825e-06	371	371
TMEM170A	-0.267684	1.65543e-07	1.93883e-06	371	371
SYNE1	-0.267642	1.66299e-07	1.94654e-06	371	371
KCTD18	-0.267595	1.6716e-07	1.95432e-06	371	371
GADD45A	-0.267521	1.68525e-07	1.96913e-06	371	371
C3orf70	-0.267514	1.68645e-07	1.96938e-06	371	370
SYTL5	-0.267431	1.70193e-07	1.98512e-06	371	361
NR2F1	-0.267363	1.71468e-07	1.99765e-06	371	370
ABCA1	-0.26718	1.74943e-07	2.03457e-06	371	371
CHSY3	-0.267148	1.75568e-07	2.04064e-06	371	371
CXCL12	-0.26712	1.761e-07	2.04564e-06	371	371
ZNF566	-0.267091	1.76669e-07	2.04867e-06	371	371
ZNF154	-0.267058	1.77309e-07	2.05369e-06	371	371
MSTN	-0.267052	1.77433e-07	2.05393e-06	371	300
VGLL3	-0.267026	1.77939e-07	2.0574e-06	371	370
SLC5A6	-0.266867	1.81052e-07	2.08912e-06	371	371
DLL1	-0.266865	1.81102e-07	2.08912e-06	371	371
CHP	-0.266764	1.83108e-07	2.11051e-06	371	371
TMEM184C	-0.266574	1.86967e-07	2.14807e-06	371	371
GCDH	-0.266492	1.88642e-07	2.16358e-06	371	371
CRK	-0.266443	1.89651e-07	2.17139e-06	371	371
DNAJB14	-0.266376	1.91042e-07	2.18481e-06	371	371
SLC12A1	-0.266204	1.94671e-07	2.22289e-06	371	260
C10orf105	-0.266144	1.95955e-07	2.23458e-06	371	369
MMRN1	-0.266016	1.98722e-07	2.26484e-06	371	371
ERN1	-0.265851	2.02333e-07	2.2981e-06	371	371
PIK3C2A	-0.265789	2.03705e-07	2.31237e-06	371	371
GIMAP7	-0.265769	2.0413e-07	2.31588e-06	371	371
GIMAP6	-0.265735	2.04906e-07	2.32335e-06	371	371
JHDM1D	-0.265473	2.1083e-07	2.38916e-06	371	371
SNAPC3	-0.265232	2.16437e-07	2.44853e-06	371	371
CACNA1C	-0.265173	2.17837e-07	2.45878e-06	371	371
PAPD4	-0.264717	2.289e-07	2.57264e-06	371	371
COPS2	-0.264638	2.30867e-07	2.59118e-06	371	371
SIRT5	-0.264602	2.31767e-07	2.59835e-06	371	371
CIRBP	-0.264535	2.33461e-07	2.61586e-06	371	371
EHBP1	-0.26417	2.42877e-07	2.71679e-06	371	371
CRTAC1	-0.264152	2.43369e-07	2.71924e-06	371	255
LOC283856	-0.264103	2.44666e-07	2.73066e-06	371	204
COG8	-0.263887	2.50454e-07	2.78901e-06	371	371
DHX36	-0.263846	2.51546e-07	2.79961e-06	371	371
LYVE1	-0.263805	2.52677e-07	2.81063e-06	371	371
PCDHB11	-0.26378	2.53369e-07	2.81676e-06	371	343
ZC3H6	-0.263754	2.54061e-07	2.82287e-06	371	371
MAP2K4	-0.263662	2.56615e-07	2.84648e-06	371	371
FOXN3	-0.263516	2.60681e-07	2.88998e-06	371	371
GJD3	-0.263414	2.63577e-07	2.91766e-06	371	371
TCF7L2	-0.263398	2.64027e-07	2.92057e-06	371	371
SH3BGRL2	-0.263277	2.67504e-07	2.95476e-06	371	371
DOCK1	-0.26327	2.67711e-07	2.95476e-06	371	371
SLC25A46	-0.263126	2.719e-07	2.99934e-06	371	371
SAT1	-0.263061	2.73819e-07	3.01715e-06	371	371
SERINC3	-0.262968	2.76573e-07	3.04246e-06	371	371
CDNF	-0.262904	2.78499e-07	3.06026e-06	371	371
ZNF280D	-0.262874	2.79383e-07	3.06828e-06	371	371
DHX29	-0.262866	2.7963e-07	3.0693e-06	371	371
SC5DL	-0.262836	2.80547e-07	3.07767e-06	371	371
FRYL	-0.262768	2.82604e-07	3.09853e-06	371	371
HIPK3	-0.262505	2.90713e-07	3.1787e-06	371	371
YPEL1	-0.262398	2.94088e-07	3.21207e-06	371	371
LYRM5	-0.262248	2.9887e-07	3.25894e-06	371	371
IGSF10	-0.262164	3.01573e-07	3.28303e-06	371	343
LRIG1	-0.262152	3.01959e-07	3.28322e-06	371	371
RAB5A	-0.261974	3.07791e-07	3.33977e-06	371	371
GLOD4	-0.26189	3.10568e-07	3.36258e-06	371	371
C5orf53	-0.261805	3.13414e-07	3.3897e-06	371	371
CCL23	-0.261739	3.15642e-07	3.41194e-06	371	309
METTL14	-0.26172	3.16271e-07	3.41677e-06	371	371
MAMDC2	-0.26159	3.20725e-07	3.45751e-06	371	351
KIAA1012	-0.261238	3.33067e-07	3.57894e-06	371	371
MKLN1	-0.261219	3.33713e-07	3.58395e-06	371	371
UBE2D3	-0.261066	3.39235e-07	3.63737e-06	371	371
NPR1	-0.260977	3.42497e-07	3.67037e-06	371	371
SESN1	-0.260948	3.43551e-07	3.67968e-06	371	371
ZCWPW2	-0.260927	3.44312e-07	3.68388e-06	371	369
2019-03-05	-0.260875	3.4624e-07	3.69855e-06	371	371
TIPARP	-0.260848	3.47242e-07	3.70726e-06	371	371
SLC45A1	-0.260827	3.48008e-07	3.71345e-06	371	371
KAT2B	-0.26078	3.49771e-07	3.72628e-06	371	371
SLC12A6	-0.26074	3.5127e-07	3.73831e-06	371	371
ZNF720	-0.260603	3.5645e-07	3.7873e-06	371	371
KIAA2026	-0.260368	3.65508e-07	3.88147e-06	371	371
C15orf43	-0.260267	3.6943e-07	3.92104e-06	371	225
MEF2A	-0.259868	3.85479e-07	4.07618e-06	371	371
BCL6	-0.259807	3.88006e-07	4.09638e-06	371	371
RAB3GAP1	-0.25978	3.89119e-07	4.10595e-06	371	371
SCN2A	-0.259752	3.90272e-07	4.11594e-06	371	320
KLF6	-0.259675	3.93487e-07	4.14545e-06	371	371
ALDH2	-0.259454	4.02841e-07	4.22167e-06	371	371
CASC4	-0.259444	4.03279e-07	4.22404e-06	371	371
RHOJ	-0.25941	4.04703e-07	4.23673e-06	371	371
ST8SIA6	-0.259376	4.06172e-07	4.24764e-06	371	158
PUS10	-0.259334	4.08005e-07	4.26234e-06	371	371
PPP2R1B	-0.259315	4.0882e-07	4.26638e-06	371	371
LOC650623	-0.259246	4.11816e-07	4.29021e-06	371	339
DDI2	-0.259191	4.14235e-07	4.30934e-06	371	358
LRRFIP1	-0.259184	4.14557e-07	4.30998e-06	371	371
ISPD	-0.25918	4.14729e-07	4.30998e-06	371	371
CASS4	-0.259095	4.18466e-07	4.34428e-06	371	366
C20orf160	-0.259042	4.20821e-07	4.36645e-06	371	371
SEMA3G	-0.258925	4.26097e-07	4.40972e-06	371	371
RSBN1	-0.258896	4.27429e-07	4.42121e-06	371	371
WDR59	-0.258889	4.27737e-07	4.4221e-06	371	371
FCN2	-0.258766	4.33347e-07	4.4685e-06	371	314
SMAD6	-0.258736	4.347e-07	4.48013e-06	371	371
CYP2U1	-0.258652	4.38601e-07	4.51566e-06	371	371
SHH	-0.258646	4.38876e-07	4.51617e-06	371	367
CTNND1	-0.258413	4.49828e-07	4.61693e-06	371	371
SETD3	-0.25834	4.53324e-07	4.65043e-06	371	371
FAM63B	-0.258299	4.55276e-07	4.66804e-06	371	371
SCAMP1	-0.258255	4.57417e-07	4.68758e-06	371	371
C11orf95	-0.258173	4.61408e-07	4.72362e-06	371	371
CALCRL	-0.25813	4.63497e-07	4.74257e-06	371	371
C9orf5	-0.258064	4.66751e-07	4.77341e-06	371	371
GLUD1	-0.258017	4.69068e-07	4.79465e-06	371	371
N4BP2L2	-0.25791	4.74388e-07	4.84406e-06	371	371
GLUD2	-0.257499	4.95388e-07	5.04556e-06	371	371
MOGAT1	-0.257443	4.98334e-07	5.07158e-06	371	313
MEF2C	-0.25743	4.99047e-07	5.07245e-06	371	371
UBE3A	-0.257394	5.00931e-07	5.08383e-06	371	371
CHD1	-0.257292	5.06303e-07	5.12789e-06	371	371
GAN	-0.257168	5.12997e-07	5.19042e-06	371	370
ZNF181	-0.257126	5.15265e-07	5.21072e-06	371	371
EDEM1	-0.256708	5.38385e-07	5.43349e-06	371	371
GARNL3	-0.256698	5.38988e-07	5.43682e-06	371	369
RAPGEF4	-0.256388	5.56798e-07	5.60512e-06	371	371
IGFBP5	-0.256375	5.57553e-07	5.60988e-06	371	371
KIAA1712	-0.256321	5.60697e-07	5.63582e-06	371	371
GNAQ	-0.256301	5.61872e-07	5.64479e-06	371	371
KIAA0355	-0.256188	5.68608e-07	5.70096e-06	371	371
HLF	-0.255974	5.81475e-07	5.82703e-06	371	371
WDR20	-0.255824	5.90653e-07	5.91603e-06	371	371
MFAP3L	-0.255559	6.07286e-07	6.07042e-06	371	371
AMOTL2	-0.255377	6.18924e-07	6.17745e-06	371	371
ZSWIM6	-0.255224	6.28891e-07	6.27065e-06	371	371
CHSY1	-0.25521	6.29856e-07	6.27714e-06	371	371
PIKFYVE	-0.255059	6.39836e-07	6.36069e-06	371	371
PRRG1	-0.254993	6.4428e-07	6.40167e-06	371	371
FBXO36	-0.254967	6.45974e-07	6.4153e-06	371	370
ARHGAP29	-0.254944	6.47548e-07	6.42773e-06	371	371
HIVEP2	-0.254937	6.4803e-07	6.42931e-06	371	371
FGD4	-0.254823	6.55793e-07	6.49985e-06	371	371
KIAA1704	-0.254676	6.65902e-07	6.58694e-06	371	371
TBC1D23	-0.254551	6.74618e-07	6.65993e-06	371	371
ZFAND5	-0.254544	6.75078e-07	6.66117e-06	371	371
BSDC1	-0.254528	6.76257e-07	6.6695e-06	371	371
OPA1	-0.254503	6.77956e-07	6.68275e-06	371	371
P2RY14	-0.254444	6.82159e-07	6.71472e-06	371	368
NARS2	-0.254444	6.8219e-07	6.71472e-06	371	371
KIAA0776	-0.254361	6.8806e-07	6.76916e-06	371	371
LACTB	-0.254218	6.98382e-07	6.86392e-06	371	371
PPM1A	-0.254151	7.03255e-07	6.90841e-06	371	371
ST3GAL6	-0.254136	7.04329e-07	6.91554e-06	371	371
DBH	-0.254121	7.05482e-07	6.92345e-06	371	367
MAP3K2	-0.254111	7.06216e-07	6.92724e-06	371	371
SMARCAD1	-0.254002	7.14239e-07	6.99926e-06	371	371
LOC285593	-0.253996	7.14693e-07	6.99954e-06	371	340
ATXN7L1	-0.253987	7.15366e-07	6.99954e-06	371	371
PELI2	-0.25391	7.21095e-07	7.04544e-06	371	370
CPEB2	-0.253892	7.22435e-07	7.05507e-06	371	371
ITGA9	-0.253853	7.25351e-07	7.07537e-06	371	370
NCRNA00182	-0.253816	7.28161e-07	7.09708e-06	371	371
ERVFRDE1	-0.253774	7.31323e-07	7.12441e-06	371	249
NR4A1	-0.253713	7.3598e-07	7.16627e-06	371	371
FAM180A	-0.253556	7.48053e-07	7.27672e-06	371	325
C17orf48	-0.253549	7.48614e-07	7.27861e-06	371	371
KRCC1	-0.253467	7.54988e-07	7.33701e-06	371	371
FABP4	-0.253439	7.57195e-07	7.35487e-06	371	369
AP1AR	-0.253389	7.61133e-07	7.38952e-06	371	371
INTS6	-0.253332	7.6561e-07	7.42936e-06	371	371
ARL5A	-0.25319	7.76947e-07	7.52838e-06	371	371
GABPA	-0.253172	7.78386e-07	7.53499e-06	371	371
TOB2	-0.253073	7.86432e-07	7.60179e-06	371	371
TSC22D3	-0.252973	7.94643e-07	7.67076e-06	371	371
KANK3	-0.252972	7.94722e-07	7.67076e-06	371	371
PLGLA	-0.252902	8.00491e-07	7.7227e-06	371	313
COLEC10	-0.252872	8.02938e-07	7.74256e-06	371	357
PCDHGB6	-0.252767	8.11731e-07	7.81978e-06	371	356
NEDD4	-0.252758	8.12423e-07	7.82267e-06	371	371
TMOD1	-0.252671	8.19815e-07	7.89003e-06	371	371
CHURC1	-0.252664	8.20367e-07	7.89153e-06	371	371
ZFYVE28	-0.252641	8.223e-07	7.9063e-06	371	371
FMO4	-0.252636	8.22781e-07	7.90711e-06	371	371
CHMP1B	-0.252629	8.23357e-07	7.90883e-06	371	371
SASH1	-0.252415	8.41778e-07	8.06633e-06	371	371
SFXN1	-0.252352	8.47274e-07	8.11509e-06	371	371
SCN11A	-0.252282	8.53336e-07	8.1653e-06	371	320
C7	-0.25216	8.64192e-07	8.26521e-06	371	370
SFRS5	-0.252059	8.73184e-07	8.3392e-06	371	371
SLC10A6	-0.251798	8.97e-07	8.55026e-06	371	286
2019-09-10	-0.251664	9.0947e-07	8.65669e-06	371	371
MUT	-0.251555	9.19724e-07	8.75011e-06	371	371
KIAA1409	-0.251505	9.24376e-07	8.79017e-06	371	304
EHHADH	-0.251431	9.31511e-07	8.8538e-06	371	371
KL	-0.2514	9.34454e-07	8.87186e-06	371	367
CDO1	-0.251397	9.34747e-07	8.87186e-06	371	371
SIPA1L1	-0.251315	9.42665e-07	8.93849e-06	371	371
FAM65B	-0.251203	9.53533e-07	9.03295e-06	371	371
GALNTL1	-0.25113	9.60746e-07	9.09695e-06	371	369
ZKSCAN1	-0.251065	9.67188e-07	9.1389e-06	371	371
DHFRL1	-0.251062	9.6747e-07	9.1389e-06	371	371
SLC10A7	-0.250997	9.73875e-07	9.18634e-06	371	371
TAB2	-0.250855	9.8823e-07	9.30061e-06	371	371
GFOD1	-0.250854	9.88324e-07	9.30061e-06	371	371
DPF3	-0.25049	1.02581e-06	9.63513e-06	371	367
PDE3A	-0.250307	1.04516e-06	9.78922e-06	371	353
PCMTD1	-0.25029	1.04705e-06	9.8023e-06	371	371
PRCP	-0.250266	1.04961e-06	9.82167e-06	371	371
NR4A3	-0.250186	1.05824e-06	9.89781e-06	371	371
SCN4A	-0.250181	1.05874e-06	9.89784e-06	371	370
WDR7	-0.250172	1.05975e-06	9.90261e-06	371	371
XPC	-0.250139	1.06332e-06	9.93134e-06	371	371
GFRA1	-0.250094	1.0682e-06	9.97222e-06	371	371
PPBP	-0.250062	1.07168e-06	9.99535e-06	371	221
FBXO34	-0.250042	1.07386e-06	1.00096e-05	371	371
TDRD3	-0.250039	1.07421e-06	1.00096e-05	371	371
GPCPD1	-0.249798	1.10103e-06	1.0226e-05	371	371
ZNF121	-0.249603	1.12309e-06	1.04114e-05	371	371
C14orf104	-0.249429	1.14321e-06	1.05881e-05	371	371
USHBP1	-0.249353	1.1521e-06	1.06605e-05	371	371
FLJ42709	-0.249308	1.1573e-06	1.07037e-05	371	371
WDR11	-0.249265	1.16241e-06	1.0741e-05	371	371
MAN2C1	-0.249228	1.16684e-06	1.07719e-05	371	371
PRKAG2	-0.249155	1.17547e-06	1.08415e-05	371	371
CETP	-0.249104	1.18158e-06	1.08878e-05	371	371
SDCCAG1	-0.248926	1.20327e-06	1.10723e-05	371	371
GOLGA1	-0.248903	1.20607e-06	1.10879e-05	371	371
BOD1L	-0.248826	1.21553e-06	1.11542e-05	371	371
RAB11B	-0.248741	1.22608e-06	1.12407e-05	371	371
ANGPT4	-0.248671	1.23478e-06	1.13152e-05	371	145
LHX6	-0.248636	1.23921e-06	1.13501e-05	371	368
SEC14L1	-0.248632	1.23973e-06	1.13501e-05	371	371
FRMD4B	-0.248613	1.24211e-06	1.13667e-05	371	371
ARHGEF10	-0.248501	1.25627e-06	1.14857e-05	371	371
APBB2	-0.248493	1.25732e-06	1.14901e-05	371	371
PDE11A	-0.248452	1.26252e-06	1.15217e-05	371	366
IRS2	-0.248403	1.26881e-06	1.15632e-05	371	371
USO1	-0.248307	1.2813e-06	1.16717e-05	371	371
C15orf33	-0.248299	1.28224e-06	1.1675e-05	371	358
SLC8A3	-0.248116	1.30634e-06	1.18706e-05	371	330
CXorf66	-0.248112	1.30679e-06	1.18706e-05	371	193
TMED7	-0.248108	1.3073e-06	1.18706e-05	371	371
FZD4	-0.248082	1.31072e-06	1.18962e-05	371	371
SNX13	-0.248037	1.31674e-06	1.19454e-05	371	371
CYLD	-0.247974	1.32518e-06	1.2011e-05	371	371
SYT9	-0.247881	1.33779e-06	1.21088e-05	371	211
INMT	-0.247775	1.3522e-06	1.2217e-05	371	370
ADK	-0.247676	1.36578e-06	1.23118e-05	371	371
LYST	-0.247621	1.37335e-06	1.23744e-05	371	371
PGM5P2	-0.247606	1.37542e-06	1.23875e-05	371	234
WDFY3	-0.247583	1.37871e-06	1.2407e-05	371	371
ANKRA2	-0.247578	1.37938e-06	1.2407e-05	371	371
GOPC	-0.247577	1.37945e-06	1.2407e-05	371	371
GPR4	-0.247482	1.39279e-06	1.25156e-05	371	371
DMXL1	-0.247237	1.42768e-06	1.2806e-05	371	371
KCNK17	-0.247129	1.44326e-06	1.29167e-05	371	340
ARHGAP31	-0.247065	1.45272e-06	1.29839e-05	371	371
HMGCLL1	-0.246932	1.47224e-06	1.31406e-05	371	242
GHR	-0.246902	1.47671e-06	1.31747e-05	371	371
IVD	-0.246783	1.49451e-06	1.33156e-05	371	371
FEM1B	-0.246774	1.49584e-06	1.33215e-05	371	371
USP8	-0.246712	1.50526e-06	1.33934e-05	371	371
IREB2	-0.246683	1.50965e-06	1.34264e-05	371	371
CLEC14A	-0.246578	1.52579e-06	1.35639e-05	371	371
PHF2	-0.246526	1.53378e-06	1.36289e-05	371	371
ZNF25	-0.246339	1.56278e-06	1.3868e-05	371	371
PTPN4	-0.246239	1.5786e-06	1.39897e-05	371	371
NAP1L5	-0.246183	1.58761e-06	1.40633e-05	371	371
PCDHGB3	-0.246157	1.59171e-06	1.40933e-05	371	310
PLSCR4	-0.246041	1.61029e-06	1.42452e-05	371	371
TMEM2	-0.24601	1.61538e-06	1.42839e-05	371	371
TGFBR3	-0.245964	1.62282e-06	1.4337e-05	371	371
C12orf72	-0.245779	1.65327e-06	1.45801e-05	371	371
RNF217	-0.245728	1.66175e-06	1.46484e-05	371	368
FAM186B	-0.245624	1.67905e-06	1.47878e-05	371	369
AQP7	-0.245559	1.69007e-06	1.48783e-05	371	369
ZNF41	-0.245489	1.70206e-06	1.49772e-05	371	371
GTF2A1	-0.245183	1.75499e-06	1.53786e-05	371	369
DCUN1D1	-0.24518	1.75539e-06	1.53786e-05	371	371
MRC1	-0.24517	1.75728e-06	1.53883e-05	371	371
TTC38	-0.245074	1.77411e-06	1.55221e-05	371	371
ADRA2B	-0.244994	1.78847e-06	1.56229e-05	371	371
GJA1	-0.244939	1.79823e-06	1.56918e-05	371	371
TM4SF18	-0.24477	1.82895e-06	1.5942e-05	371	371
LDLRAD3	-0.244768	1.82931e-06	1.5942e-05	371	366
BRWD1	-0.24475	1.83245e-06	1.59624e-05	371	371
MFSD9	-0.244684	1.84466e-06	1.60617e-05	371	371
ANKRD24	-0.244654	1.85011e-06	1.60952e-05	371	371
NBEAL1	-0.244438	1.89045e-06	1.64031e-05	371	371
TRAF6	-0.244417	1.8945e-06	1.64311e-05	371	371
ASB7	-0.244356	1.90598e-06	1.65234e-05	371	371
C10orf128	-0.244349	1.90732e-06	1.65279e-05	371	346
SEC31B	-0.244313	1.91415e-06	1.65727e-05	371	371
LYRM7	-0.244292	1.91826e-06	1.6601e-05	371	371
PCDHB18	-0.244273	1.92185e-06	1.66177e-05	371	331
SRBD1	-0.244256	1.92502e-06	1.66378e-05	371	371
CALCOCO1	-0.2442	1.93587e-06	1.67244e-05	371	371
GIMAP5	-0.244157	1.94411e-06	1.6781e-05	371	371
SMAD9	-0.244143	1.94681e-06	1.6797e-05	371	317
CPT1A	-0.244134	1.94861e-06	1.68053e-05	371	371
FOXF1	-0.244081	1.9589e-06	1.68795e-05	371	370
GOT2	-0.244044	1.9662e-06	1.6935e-05	371	371
ZNF770	-0.244011	1.97256e-06	1.69824e-05	371	371
AHCYL2	-0.243944	1.98575e-06	1.70812e-05	371	371
GYPA	-0.243938	1.98709e-06	1.70815e-05	371	57
ERLIN1	-0.243897	1.99519e-06	1.71329e-05	371	371
PPP1R16B	-0.243758	2.02288e-06	1.73482e-05	371	371
NFIC	-0.243685	2.03757e-06	1.74516e-05	371	371
UBE2G1	-0.24365	2.0447e-06	1.7504e-05	371	371
IL6ST	-0.243609	2.05311e-06	1.75621e-05	371	371
KIAA0913	-0.24358	2.05905e-06	1.75937e-05	371	371
RAD54L2	-0.243576	2.05987e-06	1.75937e-05	371	371
MKNK2	-0.243574	2.06034e-06	1.75937e-05	371	371
FDX1	-0.243534	2.06846e-06	1.76479e-05	371	371
TTC7B	-0.243517	2.07202e-06	1.76707e-05	371	371
PPM1K	-0.243478	2.0799e-06	1.77304e-05	371	371
IGFBP7	-0.243349	2.10674e-06	1.79437e-05	371	371
ERMAP	-0.243282	2.12082e-06	1.80328e-05	371	371
NAF1	-0.243164	2.14583e-06	1.82222e-05	371	371
NCRNA00174	-0.243056	2.16886e-06	1.84099e-05	371	371
IRS1	-0.24304	2.1724e-06	1.84243e-05	371	371
AOX1	-0.243027	2.17506e-06	1.84389e-05	371	371
IFT46	-0.242896	2.20346e-06	1.8648e-05	371	371
CFP	-0.242869	2.20954e-06	1.86835e-05	371	371
CYP39A1	-0.242834	2.21718e-06	1.87402e-05	371	368
ZNF800	-0.242678	2.25158e-06	1.90068e-05	371	371
TARSL2	-0.242608	2.26724e-06	1.91309e-05	371	371
MYH3	-0.242568	2.27622e-06	1.91985e-05	371	370
CAST	-0.242559	2.27833e-06	1.92082e-05	371	371
DTWD1	-0.242439	2.30553e-06	1.9407e-05	371	371
CMTM5	-0.242433	2.30679e-06	1.9407e-05	371	108
COQ6	-0.242376	2.31989e-06	1.9509e-05	371	371
SPG11	-0.24232	2.33275e-06	1.96006e-05	371	371
TSPYL1	-0.242303	2.33659e-06	1.96164e-05	371	371
ZNF778	-0.242255	2.34776e-06	1.97018e-05	371	371
ELF2	-0.24223	2.35357e-06	1.97295e-05	371	371
PPM1L	-0.242228	2.35403e-06	1.97295e-05	371	371
GYPE	-0.242116	2.38036e-06	1.99334e-05	371	299
MOSC2	-0.242088	2.38679e-06	1.99704e-05	371	371
RNF144B	-0.241969	2.41495e-06	2.01807e-05	371	371
PCDHGC5	-0.24185	2.44345e-06	2.04017e-05	371	221
CENPC1	-0.241844	2.44487e-06	2.0405e-05	371	371
ADCYAP1	-0.24184	2.44589e-06	2.0405e-05	371	284
CYP26A1	-0.241791	2.45781e-06	2.04873e-05	371	341
CFHR4	-0.241738	2.47072e-06	2.05862e-05	371	367
TAT	-0.241711	2.47731e-06	2.06325e-05	371	371
PIK3CA	-0.241698	2.48043e-06	2.06498e-05	371	371
HSPG2	-0.241679	2.48501e-06	2.06621e-05	371	371
C14orf28	-0.241565	2.51324e-06	2.08794e-05	371	371
PHACTR2	-0.241558	2.5148e-06	2.08836e-05	371	371
DNAJC25	-0.241492	2.5312e-06	2.10061e-05	371	371
CTAGE5	-0.241466	2.53777e-06	2.10481e-05	371	371
PROX1	-0.241419	2.54958e-06	2.11284e-05	371	370
SFMBT2	-0.241411	2.55165e-06	2.11368e-05	371	357
CRY2	-0.241371	2.56148e-06	2.11918e-05	371	371
SEC31A	-0.241344	2.56838e-06	2.12314e-05	371	371
PPP4R2	-0.241344	2.5684e-06	2.12314e-05	371	371
FLI1	-0.241286	2.58316e-06	2.13269e-05	371	371
GPR17	-0.241266	2.5881e-06	2.13588e-05	371	332
PCDHGA6	-0.241129	2.62321e-06	2.16127e-05	371	336
SNX25	-0.241115	2.62695e-06	2.16346e-05	371	371
NSUN6	-0.241071	2.63827e-06	2.17099e-05	371	371
LOC285696	-0.241058	2.64166e-06	2.17288e-05	371	56
GRAMD3	-0.240982	2.66135e-06	2.18636e-05	371	371
ATXN7	-0.240949	2.67008e-06	2.19264e-05	371	371
PARK2	-0.240928	2.67563e-06	2.19629e-05	371	371
AR	-0.240736	2.72647e-06	2.23434e-05	371	361
LTBP4	-0.240529	2.78257e-06	2.27844e-05	371	371
NEXN	-0.240333	2.83635e-06	2.31961e-05	371	371
2019-03-08	-0.240281	2.85077e-06	2.3295e-05	371	371
FOS	-0.240126	2.89448e-06	2.36327e-05	371	371
UBXN4	-0.24005	2.91615e-06	2.37999e-05	371	371
TRIB2	-0.240014	2.92638e-06	2.38736e-05	371	371
PPFIBP1	-0.239952	2.94427e-06	2.39999e-05	371	371
CYGB	-0.23994	2.94764e-06	2.40175e-05	371	371
CRIM1	-0.239873	2.96709e-06	2.41662e-05	371	371
CHD2	-0.239841	2.97644e-06	2.42324e-05	371	371
CHN2	-0.239831	2.97913e-06	2.42444e-05	371	371
FAM172A	-0.239801	2.98797e-06	2.43064e-05	371	371
ADH1A	-0.239736	3.00707e-06	2.44418e-05	371	371
CD14	-0.239716	3.01293e-06	2.44794e-05	371	371
EPB42	-0.239646	3.03365e-06	2.46177e-05	371	61
PBLD	-0.23962	3.04138e-06	2.46703e-05	371	371
DPP8	-0.239551	3.06186e-06	2.48163e-05	371	371
FAM43A	-0.239494	3.07894e-06	2.49445e-05	371	371
RIMKLB	-0.239475	3.08449e-06	2.49793e-05	371	371
C16orf52	-0.239469	3.08632e-06	2.4984e-05	371	371
FAM76B	-0.239244	3.15492e-06	2.55083e-05	371	371
PCDHGA12	-0.239063	3.21109e-06	2.59308e-05	371	335
NLRP14	-0.238923	3.25517e-06	2.62655e-05	371	255
PPP3CA	-0.238655	3.34112e-06	2.68936e-05	371	371
FOXP2	-0.238569	3.36904e-06	2.70965e-05	371	263
BIRC6	-0.238504	3.39047e-06	2.72579e-05	371	371
MYO1B	-0.238496	3.39305e-06	2.72676e-05	371	371
BOC	-0.238422	3.41756e-06	2.74535e-05	371	371
F2R	-0.238391	3.42795e-06	2.75258e-05	371	371
GNG7	-0.238362	3.43754e-06	2.75918e-05	371	371
EIF2AK4	-0.238325	3.44996e-06	2.76803e-05	371	371
CFL2	-0.238282	3.46434e-06	2.77733e-05	371	371
UBE2Q2P1	-0.238257	3.47291e-06	2.78308e-05	371	358
KLF8	-0.238157	3.50664e-06	2.80785e-05	371	369
ZNF654	-0.23772	3.65852e-06	2.92124e-05	371	371
SEC24A	-0.23768	3.67286e-06	2.93152e-05	371	371
ARID4B	-0.237595	3.70303e-06	2.95442e-05	371	371
ZYG11B	-0.237568	3.7127e-06	2.96095e-05	371	371
SLC30A1	-0.237563	3.71437e-06	2.96109e-05	371	371
C11orf57	-0.237474	3.7466e-06	2.98559e-05	371	371
RWDD2B	-0.237271	3.82081e-06	3.03734e-05	371	371
PNPLA7	-0.237219	3.84029e-06	3.04806e-05	371	371
UBE4A	-0.237198	3.84812e-06	3.05153e-05	371	371
ZNF18	-0.237195	3.84926e-06	3.05153e-05	371	371
RBAK	-0.237145	3.86783e-06	3.06418e-05	371	371
PPM1B	-0.237062	3.89904e-06	3.08608e-05	371	371
DKK3	-0.236882	3.96719e-06	3.13753e-05	371	371
SLC31A2	-0.236824	3.98928e-06	3.14875e-05	371	371
CDH13	-0.236774	4.00881e-06	3.16041e-05	371	371
ZNF22	-0.236692	4.04071e-06	3.18303e-05	371	371
TEAD1	-0.236607	4.07382e-06	3.20785e-05	371	371
SAMD8	-0.236421	4.14753e-06	3.25817e-05	371	371
FXN	-0.236356	4.17358e-06	3.27347e-05	371	371
ESAM	-0.236212	4.23192e-06	3.31503e-05	371	371
TBCEL	-0.236033	4.30524e-06	3.36745e-05	371	371
CNTN4	-0.236014	4.31329e-06	3.37242e-05	371	366
SHANK3	-0.236003	4.31754e-06	3.37442e-05	371	371
CLCN3	-0.235894	4.36316e-06	3.40741e-05	371	371
PPP2R5C	-0.235724	4.43493e-06	3.45866e-05	371	371
GPR125	-0.235656	4.46407e-06	3.47939e-05	371	371
ZNF254	-0.235652	4.46583e-06	3.4794e-05	371	371
CCBE1	-0.235628	4.47599e-06	3.48344e-05	371	286
PID1	-0.235627	4.47626e-06	3.48344e-05	371	371
SLC35F5	-0.235618	4.48028e-06	3.48521e-05	371	371
PPP1R3B	-0.235547	4.51073e-06	3.50616e-05	371	371
FAM26E	-0.23554	4.51378e-06	3.50716e-05	371	371
DLG2	-0.235536	4.51561e-06	3.50721e-05	371	368
SLC2A4	-0.235461	4.54812e-06	3.53108e-05	371	370
GP9	-0.235442	4.55652e-06	3.53623e-05	371	125
ZFYVE1	-0.235414	4.56883e-06	3.54432e-05	371	371
FHL1	-0.235371	4.58776e-06	3.55632e-05	371	371
FBXL17	-0.23532	4.60998e-06	3.57076e-05	371	371
ZNF837	-0.235311	4.61403e-06	3.57251e-05	371	371
RGMA	-0.235187	4.66949e-06	3.60984e-05	371	367
PAFAH2	-0.235157	4.68271e-06	3.61866e-05	371	371
SECISBP2	-0.235014	4.74739e-06	3.66312e-05	371	371
NCK1	-0.234989	4.75846e-06	3.67008e-05	371	371
C17orf91	-0.234969	4.76753e-06	3.67565e-05	371	371
TRIM22	-0.2349	4.79913e-06	3.69429e-05	371	371
UGT1A4	-0.234896	4.80132e-06	3.69455e-05	371	363
YTHDC2	-0.234813	4.8392e-06	3.72083e-05	371	371
PTGER3	-0.234786	4.85196e-06	3.72904e-05	371	366
NEK1	-0.234746	4.87071e-06	3.73928e-05	371	371
RNF111	-0.234731	4.87768e-06	3.74319e-05	371	371
C6	-0.234674	4.90425e-06	3.75923e-05	371	371
NUMA1	-0.234667	4.90745e-06	3.76024e-05	371	371
PPARGC1A	-0.234611	4.93364e-06	3.77886e-05	371	370
MDN1	-0.234534	4.97021e-06	3.80396e-05	371	371
PPP1R14A	-0.234534	4.97024e-06	3.80396e-05	371	371
NEK9	-0.234527	4.97329e-06	3.80483e-05	371	371
USP35	-0.234489	4.99181e-06	3.81753e-05	371	371
TNS1	-0.234393	5.03739e-06	3.84649e-05	371	371
BZW1	-0.234362	5.0525e-06	3.85655e-05	371	371
LOC653501	-0.234341	5.0626e-06	3.8613e-05	371	371
SETDB2	-0.234235	5.11401e-06	3.89455e-05	371	371
RREB1	-0.234177	5.14237e-06	3.91166e-05	371	371
SPG7	-0.234168	5.14677e-06	3.91351e-05	371	371
ABCE1	-0.234159	5.15129e-06	3.91545e-05	371	371
TRIM2	-0.23399	5.23474e-06	3.96766e-05	371	371
BTBD19	-0.233988	5.23591e-06	3.96766e-05	371	357
BACH2	-0.233971	5.2445e-06	3.97266e-05	371	370
LIPC	-0.233936	5.2617e-06	3.98266e-05	371	371
SETX	-0.233886	5.28698e-06	3.99875e-05	371	371
CDK13	-0.233784	5.33855e-06	4.03317e-05	371	371
C15orf37	-0.23374	5.36119e-06	4.04874e-05	371	371
MAF	-0.233686	5.38874e-06	4.06733e-05	371	371
LEPROT	-0.233683	5.3899e-06	4.06733e-05	371	370
ELK3	-0.233569	5.44882e-06	4.10868e-05	371	370
MAFK	-0.233479	5.49587e-06	4.14179e-05	371	371
SLC25A30	-0.233477	5.49689e-06	4.14179e-05	371	371
CAT	-0.233457	5.50722e-06	4.14644e-05	371	371
EBF3	-0.233422	5.52576e-06	4.15726e-05	371	367
AMACR	-0.233325	5.57661e-06	4.19077e-05	371	371
DLEC1	-0.233228	5.62826e-06	4.2248e-05	371	349
APC	-0.233112	5.6905e-06	4.26991e-05	371	371
PLVAP	-0.233081	5.70761e-06	4.28114e-05	371	371
ZNF451	-0.232979	5.763e-06	4.31943e-05	371	371
TBC1D8B	-0.232879	5.81759e-06	4.35707e-05	371	371
UGT1A3	-0.232815	5.85329e-06	4.38052e-05	371	354
ZNF75D	-0.232798	5.86252e-06	4.38577e-05	371	371
ABHD6	-0.232783	5.87101e-06	4.38949e-05	371	371
KDM4B	-0.232718	5.90712e-06	4.41417e-05	371	371
ATP7B	-0.232704	5.91515e-06	4.41851e-05	371	371
SHPK	-0.232682	5.92743e-06	4.42602e-05	371	371
GIN1	-0.232657	5.94136e-06	4.43476e-05	371	371
MPHOSPH8	-0.232638	5.95238e-06	4.44132e-05	371	371
DOCK4	-0.232582	5.98378e-06	4.46141e-05	371	371
GNG11	-0.232434	6.06808e-06	4.51865e-05	371	371
INSR	-0.232404	6.08565e-06	4.52763e-05	371	371
CACNA2D1	-0.232401	6.08735e-06	4.52763e-05	371	255
CTBS	-0.232399	6.0885e-06	4.52763e-05	371	371
ANXA10	-0.232237	6.18233e-06	4.59397e-05	371	369
CXorf36	-0.232189	6.21036e-06	4.61308e-05	371	371
TTC8	-0.23209	6.26894e-06	4.65139e-05	371	371
HNMT	-0.23203	6.30429e-06	4.67417e-05	371	371
BIRC2	-0.23203	6.30433e-06	4.67417e-05	371	371
ACER1	-0.231957	6.34834e-06	4.7033e-05	371	108
PGGT1B	-0.231892	6.38701e-06	4.72776e-05	371	371
ACER2	-0.231807	6.43845e-06	4.75944e-05	371	365
LOC201651	-0.231799	6.4438e-06	4.76163e-05	371	369
NHLRC2	-0.231762	6.46607e-06	4.77454e-05	371	370
CCDC3	-0.231735	6.48234e-06	4.78123e-05	371	371
AGXT2L2	-0.231727	6.48762e-06	4.78159e-05	371	371
ALG2	-0.23171	6.4976e-06	4.78718e-05	371	371
TSHZ1	-0.231683	6.51419e-06	4.79408e-05	371	371
ZNF540	-0.231664	6.52596e-06	4.80097e-05	371	371
TMEM106B	-0.231639	6.54145e-06	4.81059e-05	371	371
ZNF763	-0.231437	6.6674e-06	4.89598e-05	371	371
ENPEP	-0.231398	6.69165e-06	4.91198e-05	371	371
NR2F2	-0.23135	6.72188e-06	4.93235e-05	371	371
C17orf39	-0.231263	6.77727e-06	4.97109e-05	371	371
CSGALNACT1	-0.231259	6.77966e-06	4.97109e-05	371	371
ITCH	-0.230885	7.02292e-06	5.13811e-05	371	371
HSDL2	-0.230831	7.05807e-06	5.16003e-05	371	371
PPTC7	-0.230701	7.14479e-06	5.21769e-05	371	371
SLC39A14	-0.230688	7.15379e-06	5.22234e-05	371	371
NDUFAF1	-0.230575	7.22975e-06	5.27475e-05	371	371
NDUFS1	-0.230532	7.25904e-06	5.29336e-05	371	371
ARSD	-0.230517	7.26922e-06	5.29691e-05	371	371
C5orf23	-0.230482	7.29353e-06	5.31268e-05	371	370
EIF5	-0.230446	7.3178e-06	5.32841e-05	371	371
FLVCR2	-0.230413	7.34065e-06	5.34309e-05	371	371
PURA	-0.230264	7.44422e-06	5.41057e-05	371	371
STX17	-0.230223	7.47232e-06	5.42901e-05	371	371
ANKRD12	-0.230165	7.51349e-06	5.45614e-05	371	371
NEK3	-0.230162	7.51513e-06	5.45614e-05	371	371
HMBOX1	-0.230096	7.56228e-06	5.48437e-05	371	371
NCRNA00181	-0.230055	7.59098e-06	5.50118e-05	371	371
PAFAH1B2	-0.229858	7.73245e-06	5.59441e-05	371	371
PKD1L3	-0.229853	7.73634e-06	5.59441e-05	371	295
HIBADH	-0.229663	7.87477e-06	5.68822e-05	371	371
RSPRY1	-0.229616	7.90953e-06	5.71126e-05	371	371
LHPP	-0.229581	7.9354e-06	5.72786e-05	371	371
ZNF699	-0.229462	8.02377e-06	5.78746e-05	371	332
P2RX3	-0.229377	8.08756e-06	5.83135e-05	371	250
PDLIM5	-0.229272	8.16751e-06	5.88261e-05	371	371
CD93	-0.229261	8.176e-06	5.8866e-05	371	371
ARHGAP32	-0.229044	8.34261e-06	5.99789e-05	371	371
ATP11C	-0.22888	8.47145e-06	6.08612e-05	371	371
KIF27	-0.228837	8.50537e-06	6.10389e-05	371	370
ZNF276	-0.22879	8.54239e-06	6.12384e-05	371	371
DYNC1LI2	-0.228785	8.54664e-06	6.12468e-05	371	371
C11orf66	-0.228716	8.60162e-06	6.15965e-05	371	371
SCARNA7	-0.228568	8.72109e-06	6.234e-05	371	331
DDX3X	-0.22854	8.74387e-06	6.2458e-05	371	371
C17orf85	-0.228504	8.77299e-06	6.26211e-05	371	371
MT2A	-0.228477	8.7952e-06	6.27347e-05	371	371
FCHO2	-0.22845	8.81725e-06	6.28695e-05	371	371
ARHGEF15	-0.228426	8.83646e-06	6.29839e-05	371	371
SFRS2B	-0.228381	8.87371e-06	6.31963e-05	371	371
RNF11	-0.228379	8.87577e-06	6.31963e-05	371	371
RASA1	-0.228328	8.91755e-06	6.34095e-05	371	371
RNF170	-0.228325	8.91985e-06	6.34095e-05	371	371
PEX1	-0.228323	8.92164e-06	6.34095e-05	371	371
UFSP2	-0.228302	8.93907e-06	6.34673e-05	371	371
CCDC126	-0.2283	8.94112e-06	6.34673e-05	371	371
DNAJC16	-0.228163	9.0553e-06	6.41535e-05	371	371
WSCD2	-0.228116	9.09521e-06	6.44134e-05	371	268
BMP10	-0.228066	9.13766e-06	6.4645e-05	371	71
AVPR1A	-0.228061	9.14125e-06	6.46475e-05	371	333
MYST3	-0.228051	9.14955e-06	6.46815e-05	371	371
C2orf86	-0.227822	9.34614e-06	6.5956e-05	371	370
LMO2	-0.227795	9.37012e-06	6.60784e-05	371	371
CUX1	-0.227663	9.48489e-06	6.68168e-05	371	371
GSTM5	-0.227579	9.55889e-06	6.72834e-05	371	320
RAG1	-0.227577	9.56125e-06	6.72834e-05	371	356
ANGPTL2	-0.227533	9.60008e-06	6.7509e-05	371	371
FBXO38	-0.22752	9.6119e-06	6.75682e-05	371	371
MIER1	-0.227497	9.63232e-06	6.7664e-05	371	371
P2RY8	-0.227489	9.63866e-06	6.76847e-05	371	371
CA5A	-0.227359	9.75547e-06	6.84085e-05	371	357
ZRANB3	-0.227323	9.78868e-06	6.86172e-05	371	370
GVIN1	-0.227306	9.80377e-06	6.86505e-05	371	370
REL	-0.227266	9.84019e-06	6.88813e-05	371	370
SYTL2	-0.227209	9.8917e-06	6.92176e-05	371	371
ACOX1	-0.22718	9.91823e-06	6.93789e-05	371	371
GDF6	-0.227146	9.94947e-06	6.95729e-05	371	308
JAK1	-0.227124	9.97019e-06	6.96689e-05	371	371
PCDHGA5	-0.227031	1.00562e-05	7.02209e-05	371	336
PCDHB19P	-0.226946	1.01357e-05	7.07262e-05	371	285
C12orf66	-0.226882	1.01954e-05	7.10935e-05	371	371
TMEM30A	-0.22681	1.02629e-05	7.1514e-05	371	371
PCDHGB1	-0.226512	1.05496e-05	7.32482e-05	371	346
BBS2	-0.226446	1.06138e-05	7.36042e-05	371	371
SBF2	-0.226445	1.06146e-05	7.36042e-05	371	371
FLJ10213	-0.226422	1.06374e-05	7.37109e-05	371	339
ZNF440	-0.226313	1.07443e-05	7.43483e-05	371	371
DIS3	-0.226252	1.08051e-05	7.47167e-05	371	371
MBD5	-0.226193	1.08641e-05	7.50986e-05	371	371
C14orf135	-0.226067	1.09898e-05	7.59412e-05	371	371
RARB	-0.225929	1.11303e-05	7.68325e-05	371	371
SIK1	-0.225705	1.13615e-05	7.83193e-05	371	371
FNIP1	-0.225607	1.14643e-05	7.90007e-05	371	371
AKT3	-0.225586	1.14862e-05	7.91247e-05	371	371
RAPGEF6	-0.225473	1.16061e-05	7.99231e-05	371	370
CMIP	-0.225466	1.16135e-05	7.99465e-05	371	371
GRHPR	-0.225443	1.16382e-05	8.00885e-05	371	371
PCDHGA7	-0.225327	1.17625e-05	8.08602e-05	371	346
ITPKB	-0.225274	1.18198e-05	8.1198e-05	371	371
MRPS31	-0.225206	1.18938e-05	8.1678e-05	371	371
PCDHB8	-0.225115	1.19936e-05	8.2307e-05	371	344
ZNF627	-0.22511	1.19984e-05	8.23116e-05	371	371
UST	-0.224864	1.22721e-05	8.40729e-05	371	369
CD5L	-0.224827	1.23139e-05	8.43017e-05	371	360
HBM	-0.224815	1.23268e-05	8.43609e-05	371	63
RNF123	-0.224767	1.23814e-05	8.47052e-05	371	371
LOC647288	-0.224754	1.23962e-05	8.47774e-05	371	370
CTAGE1	-0.224741	1.24106e-05	8.48472e-05	371	362
MASP1	-0.224729	1.2424e-05	8.49096e-05	371	371
ALAS1	-0.224705	1.24519e-05	8.50707e-05	371	371
C4orf31	-0.224599	1.2573e-05	8.58396e-05	371	265
REST	-0.224573	1.26027e-05	8.59834e-05	371	370
GFOD2	-0.224552	1.26266e-05	8.60875e-05	371	371
IGF1	-0.224483	1.27066e-05	8.65733e-05	371	371
TMEM56	-0.224355	1.2856e-05	8.75548e-05	371	371
FZD8	-0.224196	1.30442e-05	8.87343e-05	371	371
DENND4C	-0.224194	1.3046e-05	8.87343e-05	371	371
C6orf217	-0.224157	1.30907e-05	8.89776e-05	371	253
F8	-0.22415	1.30994e-05	8.90059e-05	371	371
PCDHB10	-0.224103	1.31553e-05	8.93554e-05	371	366
HERPUD2	-0.224072	1.31919e-05	8.95733e-05	371	371
KIF26A	-0.224048	1.32215e-05	8.9744e-05	371	370
AKAP3	-0.224019	1.32564e-05	8.99067e-05	371	358
SLC2A2	-0.223986	1.32966e-05	9.01e-05	371	370
POLK	-0.223973	1.33124e-05	9.01461e-05	371	371
CEPT1	-0.223735	1.36038e-05	9.19004e-05	371	371
ZNF304	-0.223722	1.3619e-05	9.19409e-05	371	371
SH2D1B	-0.22352	1.38716e-05	9.35196e-05	371	363
AIF1L	-0.223426	1.39907e-05	9.42903e-05	371	371
FAM101B	-0.2234	1.40239e-05	9.44821e-05	371	371
SLC25A42	-0.223303	1.41485e-05	9.52894e-05	371	371
PTEN	-0.223183	1.43032e-05	9.62616e-05	371	371
INO80D	-0.22318	1.43073e-05	9.62616e-05	371	371
DYRK1A	-0.223145	1.4352e-05	9.64811e-05	371	371
TNNI3K	-0.223144	1.43545e-05	9.64811e-05	371	288
HIBCH	-0.223138	1.43622e-05	9.65007e-05	371	371
SOCS6	-0.223131	1.43712e-05	9.65284e-05	371	371
ARHGAP6	-0.222951	1.46068e-05	9.79455e-05	371	370
BDNFOS	-0.22282	1.47819e-05	9.90198e-05	371	371
ZEB2	-0.22273	1.49024e-05	9.97602e-05	371	371
TSHZ3	-0.222719	1.49182e-05	9.98101e-05	371	371
GCC2	-0.222717	1.49199e-05	9.98101e-05	371	371
OXSR1	-0.222708	1.49332e-05	9.98652e-05	371	371
DMGDH	-0.222651	1.50095e-05	0.000100308	371	371
PCDHGA11	-0.222616	1.50581e-05	0.0001006	371	327
NETO1	-0.222591	1.50919e-05	0.000100758	371	138
WBP4	-0.222475	1.52507e-05	0.000101624	371	371
REEP5	-0.222474	1.52522e-05	0.000101624	371	371
NCRNA00120	-0.222399	1.53558e-05	0.000102208	371	353
DOCK5	-0.222316	1.54721e-05	0.000102848	371	371
VPS13C	-0.222196	1.56404e-05	0.00010389	371	371
NDST3	-0.222193	1.56445e-05	0.00010389	371	191
ATG16L1	-0.222156	1.5697e-05	0.000104203	371	371
GPRASP1	-0.222142	1.57172e-05	0.000104303	371	370
TAF8	-0.222028	1.58799e-05	0.000105348	371	371
PCSK6	-0.222023	1.58862e-05	0.000105354	371	371
TMEM47	-0.221957	1.59812e-05	0.000105914	371	371
MAPK8	-0.221867	1.61127e-05	0.000106679	371	369
PDS5B	-0.221773	1.62493e-05	0.000107542	371	371
PCK1	-0.22177	1.62539e-05	0.000107542	371	371
CYP8B1	-0.221739	1.62984e-05	0.000107801	371	371
PSD3	-0.221712	1.63385e-05	0.000107995	371	371
FAM120A	-0.2217	1.63572e-05	0.000108046	371	371
KCNRG	-0.221572	1.65459e-05	0.000109148	371	356
ABHD1	-0.221545	1.65863e-05	0.000109342	371	366
PEX11G	-0.221483	1.66788e-05	0.000109843	371	371
SYNJ1	-0.221462	1.67116e-05	0.000109996	371	371
KIF13A	-0.221431	1.67575e-05	0.000110216	371	371
GDF2	-0.221379	1.68359e-05	0.000110585	371	138
NID2	-0.221255	1.70257e-05	0.000111758	371	371
PTCH2	-0.22125	1.70333e-05	0.000111771	371	358
GSTZ1	-0.221184	1.71339e-05	0.00011232	371	371
SELE	-0.221072	1.73077e-05	0.000113348	371	368
RABGAP1	-0.221032	1.737e-05	0.000113719	371	371
PEBP4	-0.220954	1.74926e-05	0.000114446	371	209
EHMT1	-0.220926	1.75359e-05	0.000114691	371	371
CWF19L2	-0.220758	1.78026e-05	0.000116359	371	371
CSNK1G3	-0.220727	1.78532e-05	0.000116613	371	371
PLN	-0.220697	1.79007e-05	0.000116847	371	357
LRRC34	-0.220625	1.8017e-05	0.000117529	371	371
JAM3	-0.220554	1.8132e-05	0.000118202	371	371
FUT11	-0.220489	1.82378e-05	0.000118814	371	371
SLIT3	-0.220449	1.8303e-05	0.0001192	371	371
ZNF616	-0.220425	1.83429e-05	0.000119421	371	371
IDE	-0.22037	1.84338e-05	0.000119895	371	371
CCDC82	-0.220365	1.8441e-05	0.000119902	371	371
AGAP11	-0.22032	1.85154e-05	0.000120308	371	347
POLN	-0.220288	1.85692e-05	0.000120579	371	370
METTL7A	-0.220208	1.87024e-05	0.000121315	371	371
SLC35A1	-0.220206	1.87066e-05	0.000121315	371	371
ZNF224	-0.219988	1.90741e-05	0.000123415	371	371
DCAF17	-0.219954	1.91327e-05	0.000123754	371	371
HELQ	-0.219948	1.91431e-05	0.000123781	371	371
CBX7	-0.219924	1.91839e-05	0.00012399	371	371
TMEM232	-0.219766	1.94573e-05	0.000125527	371	333
NFIA	-0.219734	1.95126e-05	0.000125843	371	371
MYRIP	-0.21965	1.96587e-05	0.000126663	371	371
HMG20A	-0.219625	1.97029e-05	0.000126906	371	371
HPS5	-0.219613	1.97245e-05	0.000127004	371	371
PECR	-0.219553	1.98309e-05	0.000127607	371	371
LAMA2	-0.219524	1.98817e-05	0.000127851	371	362
PRICKLE4	-0.219504	1.99173e-05	0.000128039	371	365
CYSLTR1	-0.219426	2.00556e-05	0.000128845	371	366
LRBA	-0.219393	2.01158e-05	0.000129106	371	371
IQSEC3	-0.21938	2.01381e-05	0.000129208	371	340
FBXO31	-0.219357	2.01804e-05	0.000129438	371	371
DPY19L3	-0.219319	2.02493e-05	0.000129838	371	371
PCDHGA2	-0.2193	2.02831e-05	0.000130013	371	337
COL12A1	-0.219281	2.03169e-05	0.000130188	371	370
HIC1	-0.21927	2.03368e-05	0.000130231	371	371
HECW2	-0.219234	2.04025e-05	0.00013061	371	371
IGF2	-0.219225	2.04196e-05	0.000130678	371	371
KLHL9	-0.21922	2.04276e-05	0.000130687	371	371
RAB33B	-0.219191	2.04819e-05	0.00013095	371	371
CCNT2	-0.21916	2.05383e-05	0.000131197	371	371
KGFLP2	-0.219137	2.05801e-05	0.000131409	371	369
LOC100302650	-0.219126	2.06002e-05	0.000131495	371	370
DDX24	-0.219112	2.06249e-05	0.000131611	371	371
PYGM	-0.219074	2.06963e-05	0.000131939	371	361
KIDINS220	-0.218978	2.08725e-05	0.000133021	371	371
FAM167B	-0.218907	2.10061e-05	0.000133786	371	371
BAG4	-0.218865	2.10852e-05	0.000134204	371	371
TRIL	-0.218786	2.12326e-05	0.000135056	371	371
MACF1	-0.218773	2.12581e-05	0.000135132	371	371
ZNF192	-0.218758	2.12859e-05	0.000135222	371	371
CYP20A1	-0.218753	2.12962e-05	0.000135245	371	371
TSSK1B	-0.21863	2.15294e-05	0.000136639	371	191
SLC31A1	-0.218624	2.15404e-05	0.000136665	371	371
BACE1	-0.218582	2.16226e-05	0.000137099	371	371
HEATR5A	-0.218452	2.18722e-05	0.000138621	371	371
SORBS1	-0.21845	2.18766e-05	0.000138621	371	371
RSPO3	-0.218436	2.19044e-05	0.000138709	371	312
LRRC4	-0.218418	2.19394e-05	0.000138887	371	371
SMOC1	-0.21841	2.1954e-05	0.000138935	371	371
YPEL2	-0.218379	2.20159e-05	0.000139282	371	371
FUBP3	-0.218366	2.20402e-05	0.000139392	371	371
PAMR1	-0.218346	2.20789e-05	0.000139592	371	371
SLC35D1	-0.218314	2.21427e-05	0.000139951	371	371
ADRB2	-0.218295	2.21791e-05	0.000140137	371	371
FLRT3	-0.218257	2.22548e-05	0.000140482	371	371
TSPYL4	-0.218216	2.23366e-05	0.000140954	371	371
MTMR9	-0.218155	2.2458e-05	0.000141553	371	371
P2RX2	-0.218154	2.246e-05	0.000141553	371	184
LOC90586	-0.21801	2.27482e-05	0.000143134	371	367
COL8A1	-0.218007	2.2754e-05	0.000143134	371	365
FBXL8	-0.217916	2.2938e-05	0.000144246	371	371
LAPTM4A	-0.217907	2.29555e-05	0.00014431	371	371
PCSK1	-0.217807	2.31605e-05	0.000145462	371	284
KIAA0494	-0.217708	2.33651e-05	0.000146608	371	371
IMPACT	-0.217664	2.3455e-05	0.000147033	371	371
OGN	-0.217657	2.34709e-05	0.000147086	371	330
SLK	-0.217601	2.3586e-05	0.000147761	371	371
HERC2	-0.217544	2.37048e-05	0.000148412	371	371
MGC21881	-0.217534	2.37261e-05	0.000148499	371	371
NEDD9	-0.217511	2.37752e-05	0.000148699	371	371
FTSJD1	-0.217508	2.37804e-05	0.000148699	371	371
SEC24D	-0.217486	2.38282e-05	0.000148951	371	371
ZNF562	-0.217338	2.41413e-05	0.000150671	371	371
TPMT	-0.21721	2.44162e-05	0.000152292	371	371
NEU3	-0.21716	2.45229e-05	0.000152861	371	370
SLC16A12	-0.217109	2.46346e-05	0.000153509	371	364
ZNF503	-0.217055	2.47529e-05	0.00015415	371	371
SLC16A11	-0.217026	2.48146e-05	0.000154487	371	371
LOC100272216	-0.216945	2.49929e-05	0.000155548	371	333
GLYATL1	-0.21684	2.52259e-05	0.0001569	371	369
MBIP	-0.216636	2.56846e-05	0.000159454	371	371
ANO3	-0.21663	2.56966e-05	0.000159479	371	322
C6orf155	-0.216549	2.58803e-05	0.000160569	371	337
ZNF417	-0.216532	2.592e-05	0.000160765	371	371
RCHY1	-0.216486	2.6025e-05	0.000161316	371	371
VAMP2	-0.216472	2.60562e-05	0.000161459	371	371
STAT5B	-0.216374	2.6282e-05	0.000162808	371	371
STAT3	-0.216339	2.63647e-05	0.000163219	371	371
TRAPPC6B	-0.216305	2.64432e-05	0.000163654	371	371
AVIL	-0.216301	2.6452e-05	0.000163657	371	369
NIPSNAP3A	-0.216274	2.65137e-05	0.000163988	371	371
WDR78	-0.216264	2.65387e-05	0.000164092	371	370
KIAA1715	-0.216223	2.66341e-05	0.000164631	371	371
DEPDC5	-0.216212	2.66605e-05	0.000164732	371	371
EDIL3	-0.216209	2.66671e-05	0.000164732	371	337
RABEP1	-0.216202	2.66825e-05	0.000164776	371	371
RYBP	-0.21618	2.67337e-05	0.000165041	371	371
ITFG1	-0.216155	2.67933e-05	0.000165358	371	371
KIAA1430	-0.215992	2.71794e-05	0.000167637	371	371
CBLB	-0.21586	2.74967e-05	0.000169489	371	371
EXPH5	-0.215693	2.79033e-05	0.000171783	371	367
BHLHE40	-0.215668	2.79641e-05	0.000172104	371	371
PRDM2	-0.215636	2.80434e-05	0.000172539	371	371
DHODH	-0.215556	2.82403e-05	0.000173643	371	371
INVS	-0.215543	2.82728e-05	0.000173789	371	371
ROCK2	-0.215532	2.82981e-05	0.000173891	371	371
TCF12	-0.21552	2.83279e-05	0.000174021	371	371
ACOT2	-0.215506	2.83645e-05	0.000174192	371	371
LRRC29	-0.215453	2.84963e-05	0.000174947	371	371
PCDH7	-0.21542	2.85787e-05	0.000175345	371	350
TGFBRAP1	-0.215382	2.86735e-05	0.000175872	371	367
LDHD	-0.21537	2.87035e-05	0.000176002	371	371
ETFA	-0.215366	2.87123e-05	0.000176002	371	371
OCIAD1	-0.21532	2.88282e-05	0.000176604	371	371
KCNA3	-0.215249	2.90092e-05	0.000177603	371	342
APOL6	-0.215194	2.91489e-05	0.000178404	371	371
FAM174A	-0.214799	3.01714e-05	0.000184153	371	371
HIPK2	-0.214404	3.12317e-05	0.000190333	371	371
FGF7	-0.214349	3.13799e-05	0.000191061	371	368
GOLPH3	-0.21428	3.15686e-05	0.000192092	371	371
PHF17	-0.214209	3.17665e-05	0.000193237	371	371
MRVI1	-0.214197	3.17985e-05	0.000193373	371	371
C13orf1	-0.214153	3.1922e-05	0.000194016	371	371
NKIRAS1	-0.214147	3.19377e-05	0.000194042	371	371
HERC1	-0.21407	3.21509e-05	0.000195278	371	371
DNMBP	-0.214032	3.22583e-05	0.00019587	371	371
C1orf95	-0.214017	3.22996e-05	0.000196061	371	330
GNE	-0.214012	3.23162e-05	0.000196102	371	371
FLJ13197	-0.213827	3.2838e-05	0.000199026	371	364
ADCY1	-0.213803	3.29083e-05	0.000199391	371	371
C2orf58	-0.213746	3.30707e-05	0.000200254	371	349
LOC646982	-0.21361	3.34642e-05	0.000202452	371	265
FAM185A	-0.213601	3.34903e-05	0.000202548	371	371
DMD	-0.213554	3.36269e-05	0.000203251	371	371
SH2D3C	-0.213488	3.38189e-05	0.00020435	371	371
ZZEF1	-0.213447	3.39414e-05	0.000204966	371	371
CLEC4M	-0.213421	3.40171e-05	0.000205298	371	211
NHLRC3	-0.213405	3.40633e-05	0.000205515	371	371
SEC63	-0.213341	3.42539e-05	0.000206415	371	371
MYSM1	-0.213282	3.44299e-05	0.000207413	371	371
PEX12	-0.213278	3.44419e-05	0.000207422	371	371
KLHL36	-0.213271	3.44613e-05	0.000207476	371	371
NBLA00301	-0.21326	3.4496e-05	0.000207622	371	297
HTR2B	-0.213188	3.47122e-05	0.000208797	371	371
FCN3	-0.213048	3.51359e-05	0.000210964	371	371
ZBTB1	-0.213012	3.5246e-05	0.000211497	371	371
RBM18	-0.212997	3.52898e-05	0.000211696	371	371
ACAP2	-0.212879	3.5653e-05	0.000213746	371	371
LOC150786	-0.212725	3.61299e-05	0.000216345	371	370
FBLN2	-0.212677	3.628e-05	0.000217036	371	370
LCA5	-0.212671	3.62998e-05	0.000217036	371	369
PTPRM	-0.212635	3.64122e-05	0.000217577	371	371
ACADM	-0.21263	3.64289e-05	0.000217612	371	371
CA5B	-0.212622	3.6453e-05	0.000217691	371	371
ADCY4	-0.212511	3.68055e-05	0.000219664	371	371
SYVN1	-0.212495	3.68551e-05	0.000219894	371	371
ACR	-0.212476	3.69168e-05	0.000220196	371	349
NAA30	-0.212461	3.69657e-05	0.000220356	371	371
UNC5C	-0.212415	3.7111e-05	0.00022109	371	308
ZNF317	-0.212304	3.74691e-05	0.00022309	371	371
ZNF680	-0.212278	3.75533e-05	0.000223525	371	371
FAM19A1	-0.212251	3.76423e-05	0.000223987	371	238
TMEM154	-0.212217	3.77526e-05	0.000224577	371	365
psiTPTE22	-0.212211	3.77728e-05	0.00022463	371	341
PLK2	-0.212201	3.78041e-05	0.000224682	371	371
TRIM23	-0.212197	3.78175e-05	0.000224694	371	371
RC3H2	-0.212168	3.79104e-05	0.000225112	371	371
RNF165	-0.212078	3.82078e-05	0.000226743	371	353
PICALM	-0.212049	3.83019e-05	0.000227098	371	371
C9orf95	-0.212044	3.83182e-05	0.000227128	371	371
FAM126B	-0.212019	3.84004e-05	0.000227479	371	371
HIF3A	-0.211951	3.86278e-05	0.000228623	371	367
MIPEP	-0.211929	3.87006e-05	0.000228985	371	371
LTBP1	-0.211915	3.87489e-05	0.000229184	371	371
ZNF385B	-0.211912	3.87571e-05	0.000229184	371	367
SLC25A25	-0.211769	3.92362e-05	0.000231879	371	371
RAB11FIP2	-0.211721	3.9399e-05	0.000232772	371	371
HBB	-0.21169	3.95039e-05	0.000233254	371	371
HULC	-0.211671	3.95697e-05	0.000233543	371	369
WDR82	-0.211614	3.97633e-05	0.000234368	371	371
F11	-0.211503	4.01469e-05	0.000236489	371	369
FKRP	-0.211486	4.02034e-05	0.000236746	371	371
TMEM220	-0.211483	4.02143e-05	0.000236746	371	371
ATP13A3	-0.211288	4.08956e-05	0.000240615	371	371
SLC25A20	-0.211187	4.1249e-05	0.000242498	371	371
KLF2	-0.211187	4.12521e-05	0.000242498	371	371
BDP1	-0.21118	4.12762e-05	0.000242568	371	371
HIGD1A	-0.211138	4.14237e-05	0.000243291	371	371
C9orf72	-0.211126	4.14682e-05	0.000243409	371	371
SBDSP1	-0.211071	4.1662e-05	0.000244402	371	371
DACH1	-0.211042	4.17667e-05	0.000244945	371	354
CARD8	-0.211036	4.17885e-05	0.000245	371	371
TMF1	-0.211004	4.19042e-05	0.000245606	371	371
CXCR7	-0.210994	4.19401e-05	0.000245672	371	371
BTBD7	-0.21097	4.20245e-05	0.000246094	371	371
PCDHGA9	-0.210948	4.21046e-05	0.000246418	371	340
KCNA5	-0.210867	4.23973e-05	0.000247913	371	347
SGK1	-0.210777	4.27254e-05	0.000249538	371	371
GREM2	-0.210759	4.27924e-05	0.000249856	371	357
ARAP3	-0.210755	4.28088e-05	0.000249879	371	371
RNF6	-0.2107	4.30087e-05	0.000250973	371	371
WHAMML2	-0.210563	4.35186e-05	0.000253576	371	371
MED17	-0.210385	4.41831e-05	0.000256698	371	371
RP1L1	-0.210312	4.44607e-05	0.000258009	371	275
TSPYL5	-0.210198	4.48957e-05	0.000260306	371	371
ZCCHC14	-0.210073	4.5377e-05	0.000262791	371	371
TAX1BP1	-0.210032	4.55396e-05	0.000263656	371	371
SMG6	-0.210003	4.5652e-05	0.00026423	371	371
LINGO4	-0.20992	4.59748e-05	0.000265867	371	361
C21orf91	-0.209875	4.6154e-05	0.000266825	371	371
KBTBD6	-0.209841	4.62877e-05	0.000267521	371	371
ANGPTL7	-0.209836	4.63048e-05	0.000267542	371	116
ST6GALNAC6	-0.209776	4.6544e-05	0.000268846	371	371
FYCO1	-0.209738	4.66957e-05	0.000269644	371	371
CCNH	-0.209645	4.70658e-05	0.000271477	371	371
CCDC147	-0.209643	4.70752e-05	0.000271477	371	295
EIF2AK3	-0.209638	4.70949e-05	0.000271477	371	371
KLF10	-0.209513	4.7599e-05	0.000274145	371	371
ZNF790	-0.20946	4.78155e-05	0.000275312	371	371
LHFP	-0.209431	4.79305e-05	0.000275894	371	371
WNT9B	-0.209355	4.82426e-05	0.000277531	371	253
SUCLG2	-0.209327	4.83579e-05	0.000277851	371	371
DDTL	-0.209325	4.8368e-05	0.000277851	371	371
TTC17	-0.209317	4.84013e-05	0.000277962	371	371
PCGF5	-0.209267	4.86045e-05	0.000278968	371	371
KPNA3	-0.209226	4.87755e-05	0.000279789	371	371
PCDHGA3	-0.209106	4.92762e-05	0.000282336	371	339
APOA5	-0.209079	4.93879e-05	0.000282894	371	371
BDNF	-0.209063	4.94554e-05	0.0002832	371	344
TSHZ2	-0.209031	4.95907e-05	0.000283811	371	369
MAML3	-0.208982	4.97978e-05	0.000284832	371	371
MLL5	-0.208921	5.00547e-05	0.000286138	371	371
CCDC90B	-0.20889	5.01905e-05	0.000286832	371	371
RGS5	-0.208752	5.07805e-05	0.000289788	371	371
PITPNB	-0.20874	5.08326e-05	0.000290002	371	371
CRYL1	-0.208638	5.12753e-05	0.00029236	371	371
ZFHX3	-0.20847	5.2011e-05	0.000296131	371	371
SLITRK6	-0.208377	5.2421e-05	0.000298381	371	181
N4BP1	-0.208366	5.24692e-05	0.000298569	371	371
MPP5	-0.208341	5.25794e-05	0.000299111	371	371
MTMR9L	-0.208334	5.26139e-05	0.000299222	371	371
PTCH1	-0.208259	5.29461e-05	0.000301025	371	371
MCC	-0.208228	5.30863e-05	0.000301736	371	371
ZMYND11	-0.20818	5.33005e-05	0.000302867	371	371
KIAA0586	-0.208117	5.35875e-05	0.000304411	371	371
SCN7A	-0.20809	5.37098e-05	0.000305019	371	243
SLC25A36	-0.208031	5.39788e-05	0.000306459	371	371
ZFYVE9	-0.207997	5.41333e-05	0.000307249	371	371
HGSNAT	-0.207918	5.44967e-05	0.000309136	371	371
ITGA8	-0.20789	5.46253e-05	0.000309688	371	296
SNTB2	-0.207869	5.4722e-05	0.000310148	371	371
IFIT5	-0.207822	5.494e-05	0.000311296	371	371
PINK1	-0.207814	5.49796e-05	0.000311343	371	371
MAGI2	-0.207791	5.50829e-05	0.00031175	371	371
ADAMTS18	-0.207759	5.52339e-05	0.000312339	371	280
HEATR5B	-0.207628	5.58489e-05	0.000315727	371	371
HADHB	-0.207602	5.59722e-05	0.000316248	371	371
LZTFL1	-0.207577	5.60892e-05	0.000316816	371	371
KIAA0430	-0.207324	5.72987e-05	0.000323098	371	371
FAM18B2	-0.207307	5.73788e-05	0.000323458	371	371
PCDH12	-0.20726	5.76066e-05	0.000324466	371	371
REV1	-0.207232	5.77425e-05	0.000324865	371	371
CCDC144A	-0.207186	5.7969e-05	0.000325863	371	238
PLCG2	-0.207165	5.8069e-05	0.000326333	371	371
ADAMTS4	-0.207092	5.84309e-05	0.000328274	371	371
CCBP2	-0.207081	5.84815e-05	0.000328466	371	371
QDPR	-0.207037	5.87028e-05	0.000329616	371	371
C3orf36	-0.20702	5.87821e-05	0.000329968	371	305
DDX21	-0.207015	5.88098e-05	0.000330031	371	371
KIAA1191	-0.206974	5.90144e-05	0.000331086	371	371
ZNF571	-0.206933	5.92172e-05	0.000332036	371	370
ACAA2	-0.20691	5.93315e-05	0.000332461	371	371
PBX1	-0.206908	5.9343e-05	0.000332461	371	371
TTC14	-0.206817	5.97946e-05	0.000334802	371	371
FAM163B	-0.206752	6.01253e-05	0.00033656	371	208
SCAPER	-0.206693	6.04213e-05	0.000338027	371	371
TXNDC15	-0.206667	6.05556e-05	0.000338683	371	371
EGR3	-0.206656	6.06141e-05	0.000338915	371	369
C11orf58	-0.206619	6.08012e-05	0.000339708	371	371
P4HA3	-0.206618	6.08072e-05	0.000339708	371	365
CD226	-0.206612	6.08339e-05	0.000339763	371	357
MTM1	-0.206584	6.09801e-05	0.000340484	371	371
FNIP2	-0.206508	6.13682e-05	0.000342363	371	371
FAM151B	-0.206466	6.15855e-05	0.000343382	371	370
LOC728989	-0.206456	6.16386e-05	0.000343583	371	331
GEM	-0.206317	6.23609e-05	0.000347415	371	371
PARP9	-0.206292	6.24934e-05	0.000348055	371	371
C9orf130	-0.206185	6.30575e-05	0.000350609	371	371
LPHN2	-0.206175	6.31072e-05	0.000350787	371	371
TBL1X	-0.206111	6.3446e-05	0.000352376	371	371
LRIT3	-0.206039	6.38296e-05	0.000354308	371	342
C9orf41	-0.206026	6.38984e-05	0.000354592	371	370
GK3P	-0.206005	6.40123e-05	0.000355125	371	371
PLEKHA1	-0.205995	6.40648e-05	0.000355317	371	371
ZNF823	-0.205991	6.40903e-05	0.00035536	371	371
SALL1	-0.205892	6.4622e-05	0.000357909	371	370
DHTKD1	-0.205854	6.48254e-05	0.000358902	371	371
PDZRN4	-0.205834	6.49376e-05	0.000359258	371	238
TWIST2	-0.205813	6.50517e-05	0.000359789	371	274
SLTM	-0.205782	6.52223e-05	0.000360632	371	371
SYN2	-0.205775	6.52574e-05	0.000360726	371	223
MICALCL	-0.205733	6.54884e-05	0.000361803	371	340
KLF7	-0.205691	6.57154e-05	0.000362855	371	361
EIF4A2	-0.205625	6.60792e-05	0.000364662	371	371
PDGFB	-0.205498	6.67885e-05	0.00036827	371	371
ABLIM1	-0.20544	6.71138e-05	0.000369962	371	371
MERTK	-0.205362	6.75511e-05	0.000372021	371	371
DCHS1	-0.20536	6.75632e-05	0.000372021	371	371
OMD	-0.205154	6.87328e-05	0.000378049	371	297
FYTTD1	-0.205049	6.93396e-05	0.000381176	371	371
ARL5B	-0.205016	6.95285e-05	0.000381899	371	371
RNF146	-0.204968	6.98067e-05	0.00038311	371	371
CYP46A1	-0.204951	6.99053e-05	0.000383334	371	366
ZNF827	-0.204916	7.01103e-05	0.000384247	371	328
NOTUM	-0.204864	7.04169e-05	0.000385609	371	366
EP300	-0.204834	7.05884e-05	0.000386336	371	371
RNF138P1	-0.204799	7.07966e-05	0.000387262	371	367
SGPP1	-0.204749	7.1094e-05	0.000388676	371	371
LCOR	-0.204728	7.1218e-05	0.000389181	371	370
SLC39A9	-0.204525	7.243e-05	0.000395329	371	371
ELL2	-0.204355	7.3458e-05	0.000400501	371	371
ZBTB7A	-0.204249	7.41122e-05	0.000403847	371	371
DNAJC24	-0.204182	7.45203e-05	0.000405848	371	371
ACOT12	-0.204166	7.46238e-05	0.00040619	371	367
GOLGA6B	-0.204081	7.51494e-05	0.000408604	371	312
MYOM2	-0.20397	7.58484e-05	0.000411923	371	368
ANKRD17	-0.203967	7.58632e-05	0.000411923	371	371
SLC2A10	-0.203937	7.60547e-05	0.000412738	371	371
ARHGEF17	-0.203921	7.61568e-05	0.00041318	371	371
GPR45	-0.203788	7.69977e-05	0.000417288	371	189
RBM9	-0.203653	7.78663e-05	0.000421683	371	371
AKAP12	-0.203652	7.78722e-05	0.000421683	371	371
CCDC39	-0.203594	7.82486e-05	0.000423376	371	345
TNFRSF10D	-0.203581	7.83316e-05	0.000423594	371	371
ADAMTS12	-0.203554	7.85084e-05	0.00042432	371	358
FAM114A2	-0.20352	7.87246e-05	0.000425373	371	371
EID1	-0.203352	7.98293e-05	0.000430875	371	371
GOLIM4	-0.203324	8.00132e-05	0.00043164	371	371
ZFYVE21	-0.203314	8.00783e-05	0.000431868	371	371
NUDT10	-0.203264	8.04115e-05	0.000433313	371	253
USP34	-0.203211	8.07623e-05	0.000435086	371	371
DDX19B	-0.2032	8.08413e-05	0.000435394	371	371
MAML2	-0.203105	8.14773e-05	0.000438345	371	370
PALM2	-0.203057	8.17978e-05	0.000439594	371	371
EPC1	-0.202979	8.23278e-05	0.000442204	371	370
PHKB	-0.202904	8.28349e-05	0.000444568	371	371
ARID1B	-0.202851	8.32038e-05	0.000446188	371	371
ZBTB7C	-0.202842	8.32619e-05	0.000446379	371	365
PKHD1	-0.202824	8.33876e-05	0.000446932	371	363
PDGFRB	-0.20279	8.3623e-05	0.000447832	371	371
KLHDC10	-0.202726	8.40604e-05	0.000449812	371	371
PER1	-0.202674	8.4424e-05	0.000451636	371	371
ATE1	-0.202631	8.47249e-05	0.000453003	371	371
TPPP2	-0.202533	8.54093e-05	0.000456295	371	336
ZNF17	-0.202529	8.54366e-05	0.000456318	371	371
ZNF160	-0.202484	8.57569e-05	0.000457784	371	371
GPRIN3	-0.202396	8.63786e-05	0.000460621	371	371
RANBP10	-0.202363	8.66136e-05	0.000461738	371	371
SNX4	-0.202338	8.6792e-05	0.000462566	371	371
VEGFC	-0.20229	8.71388e-05	0.000463917	371	371
C11orf1	-0.202164	8.80444e-05	0.000468614	371	371
MAN1A1	-0.202153	8.81229e-05	0.000468906	371	371
EGFLAM	-0.202093	8.85569e-05	0.000470964	371	371
TRIM58	-0.202032	8.90062e-05	0.000472946	371	335
DLL4	-0.20203	8.90207e-05	0.000472946	371	371
MAGEL2	-0.202029	8.90246e-05	0.000472946	371	257
SLC24A1	-0.202015	8.91279e-05	0.000473369	371	371
HHIP	-0.202002	8.92208e-05	0.000473736	371	263
SLC27A5	-0.201961	8.95276e-05	0.000474974	371	371
NKAPL	-0.201958	8.95494e-05	0.000474974	371	352
RNF169	-0.20185	9.03436e-05	0.000478677	371	371
RPUSD4	-0.20183	9.04962e-05	0.000479358	371	371
ZNF548	-0.201798	9.07311e-05	0.000480347	371	371
PPP1R3D	-0.201767	9.09651e-05	0.00048133	371	371
ARHGAP42	-0.201751	9.10793e-05	0.000481806	371	371
HBA2	-0.201743	9.1143e-05	0.000482015	371	371
BCAS3	-0.201664	9.17321e-05	0.000484487	371	371
MYH11	-0.201627	9.20127e-05	0.000485841	371	371
ATG4C	-0.201442	9.34174e-05	0.000492344	371	371
CPB2	-0.20142	9.35875e-05	0.00049311	371	370
LYPD2	-0.201309	9.444e-05	0.000497021	371	150
ANUBL1	-0.201298	9.4528e-05	0.000497277	371	371
SULT4A1	-0.201271	9.47339e-05	0.000498228	371	247
FAM134B	-0.201242	9.49585e-05	0.000499278	371	371
C9orf129	-0.201166	9.55527e-05	0.000502137	371	360
NPR3	-0.201123	9.58944e-05	0.000503601	371	360
PLCL1	-0.201114	9.59596e-05	0.000503744	371	370
SDK1	-0.201093	9.61222e-05	0.000504465	371	363
FAS	-0.201037	9.6568e-05	0.000506403	371	371
SLAIN2	-0.200973	9.70766e-05	0.000508937	371	371
ACVR2A	-0.200959	9.71888e-05	0.000509391	371	371
C5orf35	-0.200919	9.75042e-05	0.000510655	371	371
PHLDB2	-0.200906	9.76106e-05	0.000511064	371	371
KLF3	-0.200873	9.78712e-05	0.000512294	371	371
C3orf58	-0.200858	9.79904e-05	0.000512783	371	371
EBF2	-0.20082	9.82926e-05	0.000514095	371	309
RFX1	-0.200652	9.96529e-05	0.000520389	371	371
BNC1	-0.200626	9.98606e-05	0.000521337	371	254
ERC1	-0.200616	9.99428e-05	0.000521629	371	371
SRPX	-0.20061	9.99947e-05	0.000521764	371	368
PEG3	-0.200581	0.000100233	0.000522868	371	369
PHOSPHO1	-0.200554	0.000100456	0.000523664	371	333
SYT15	-0.200553	0.000100464	0.000523664	371	370
MLL3	-0.200531	0.00010064	0.000524442	371	371
LRSAM1	-0.200476	0.000101093	0.000526665	371	371
NPHP3	-0.200455	0.000101267	0.000527357	371	371
DENND5B	-0.20045	0.000101305	0.000527357	371	371
UVRAG	-0.200436	0.000101423	0.000527832	371	371
ZNF23	-0.200418	0.000101577	0.000528496	371	371
OR2C1	-0.200407	0.000101668	0.000528833	371	183
LUZP2	-0.200396	0.000101757	0.000529156	371	264
C6orf72	-0.200387	0.000101827	0.000529383	371	371
LILRB5	-0.200357	0.000102076	0.000530538	371	371
RAP2C	-0.200245	0.000103015	0.000535	371	371
FLJ10038	-0.200212	0.000103292	0.000536302	371	371
C11orf30	-0.200088	0.000104343	0.00054119	371	371
LRRC8C	-0.200064	0.000104545	0.000542097	371	371
ZNF425	-0.199906	0.000105895	0.000548245	371	370
ZBTB44	-0.199833	0.000106527	0.000551227	371	371
LOXHD1	-0.199818	0.000106657	0.000551499	371	289
PPP3R1	-0.199817	0.000106662	0.000551499	371	371
RSPO2	-0.199803	0.000106784	0.000551744	371	249
KCNJ2	-0.199746	0.00010728	0.000553976	371	370
FAM13A	-0.199712	0.000107582	0.000555195	371	371
RGPD3	-0.199674	0.000107913	0.000556522	371	371
DIO2	-0.199662	0.000108018	0.000556921	371	349
ASMTL	-0.199613	0.00010845	0.00055871	371	371
ABHD15	-0.199585	0.000108692	0.000559816	371	371
GYS2	-0.19943	0.000110072	0.000566775	371	370
ATG2A	-0.199418	0.000110181	0.000567042	371	371
TNXB	-0.199412	0.000110236	0.000567178	371	371
ANGPTL6	-0.1994	0.000110338	0.00056756	371	369
MPHOSPH10	-0.199392	0.000110407	0.000567765	371	371
GJA4	-0.199374	0.000110567	0.000568445	371	371
LECT2	-0.199202	0.00011212	0.000575778	371	366
USPL1	-0.199144	0.000112652	0.000578059	371	371
USP12	-0.199098	0.000113069	0.000579511	371	371
L2HGDH	-0.199056	0.000113455	0.00058134	371	371
SMAD7	-0.199041	0.000113595	0.000581909	371	371
MIA2	-0.198906	0.000114848	0.000587874	371	367
ERP44	-0.198799	0.000115844	0.00059237	371	371
ZBTB4	-0.198799	0.000115846	0.00059237	371	371
C9orf71	-0.198787	0.000115954	0.000592733	371	163
NTRK3	-0.198785	0.000115976	0.000592733	371	299
ZNF397	-0.198763	0.000116178	0.000593461	371	371
SPRYD4	-0.198547	0.000118228	0.000602853	371	371
ARHGAP23	-0.198492	0.000118756	0.000605231	371	371
GGT5	-0.198478	0.000118889	0.000605756	371	371
PARD3B	-0.198473	0.000118935	0.000605834	371	368
ACSL1	-0.198395	0.000119685	0.000609342	371	371
RASIP1	-0.198314	0.000120475	0.00061321	371	371
ANGPTL1	-0.198297	0.000120635	0.000613869	371	371
RNASE4	-0.198243	0.000121164	0.000616242	371	371
KIRREL	-0.198227	0.000121318	0.000616714	371	344
LEPR	-0.198128	0.000122292	0.000621348	371	371
C21orf34	-0.198101	0.000122557	0.000622533	371	366
MTMR3	-0.197936	0.000124196	0.000630538	371	371
NFKB1	-0.19778	0.000125772	0.000637888	371	371
EXOC5	-0.197766	0.000125911	0.000638432	371	371
SPRY3	-0.197698	0.000126597	0.000641749	371	371
AQR	-0.197689	0.000126691	0.000642062	371	371
UGT1A5	-0.197631	0.000127285	0.000644742	371	323
C16orf46	-0.197506	0.000128574	0.000650612	371	371
NARG2	-0.197457	0.000129076	0.000652654	371	371
IGFBP1	-0.197452	0.000129129	0.000652757	371	370
TRAPPC10	-0.197409	0.000129573	0.000654665	371	371
CAMK4	-0.197402	0.000129648	0.000654882	371	327
ADH5	-0.197339	0.000130306	0.00065787	371	371
JAK2	-0.197234	0.000131413	0.000663125	371	371
LIG4	-0.197164	0.00013215	0.000666506	371	371
NR2C2	-0.197126	0.000132554	0.000668203	371	371
SH3GL3	-0.197088	0.000132956	0.000669891	371	126
LAP3	-0.197061	0.000133244	0.000671173	371	371
ERICH1	-0.197021	0.000133674	0.000673166	371	371
JUN	-0.196954	0.000134394	0.00067645	371	371
CYBRD1	-0.196942	0.000134524	0.000676935	371	371
TNRC6A	-0.196893	0.000135047	0.000679008	371	371
SOCS3	-0.196891	0.000135072	0.000679008	371	371
MBNL1	-0.196885	0.00013514	0.000679179	371	371
CH25H	-0.196876	0.00013524	0.00067951	371	369
CHI3L1	-0.196819	0.000135852	0.000682034	371	371
CHRM2	-0.196817	0.000135876	0.000682034	371	80
PKD2	-0.196796	0.000136101	0.000682631	371	371
ZC3H14	-0.19678	0.00013628	0.000683182	371	371
FAM84A	-0.196754	0.000136565	0.000684268	371	370
POLR2A	-0.19672	0.000136932	0.000685589	371	371
BMP6	-0.196654	0.000137664	0.00068908	371	371
ZFP2	-0.196577	0.000138517	0.00069283	371	369
KIAA0754	-0.196399	0.000140498	0.000701678	371	370
AKAP6	-0.196262	0.000142042	0.000708576	371	370
PIK3R4	-0.196137	0.000143467	0.000714535	371	371
FLJ45340	-0.196121	0.000143656	0.000715298	371	371
ALDH1A3	-0.196034	0.000144652	0.0007199	371	363
TJP1	-0.196022	0.000144791	0.000720411	371	371
SESN3	-0.195923	0.000145938	0.000725934	371	368
EIF4EBP2	-0.195914	0.000146041	0.000726269	371	371
ANGPT1	-0.19589	0.000146318	0.000727462	371	366
CCDC144B	-0.195805	0.000147317	0.0007317	371	285
C6orf211	-0.19578	0.000147614	0.000732626	371	371
RNF13	-0.195763	0.000147817	0.000733388	371	371
UBN2	-0.195738	0.00014811	0.000734173	371	371
ZFP36L2	-0.195713	0.000148406	0.000735461	371	371
GOLGA6A	-0.195697	0.000148597	0.000736221	371	241
GLT8D2	-0.19569	0.000148675	0.000736428	371	371
LCAT	-0.195653	0.000149108	0.000738387	371	371
C19orf71	-0.195612	0.000149595	0.000740429	371	351
TFB1M	-0.195537	0.000150501	0.000743806	371	371
ADAMTSL3	-0.195488	0.00015108	0.000746483	371	371
PTPN9	-0.195314	0.000153191	0.000755412	371	371
RAB18	-0.19515	0.000155196	0.000764733	371	371
ZNF197	-0.195114	0.000155646	0.000766763	371	371
INO80	-0.195078	0.000156086	0.00076855	371	371
C14orf43	-0.195041	0.000156553	0.000770655	371	371
ERBB2IP	-0.194999	0.000157068	0.000773002	371	371
ARHGAP5	-0.194918	0.000158086	0.000777244	371	371
TMED10	-0.194896	0.000158358	0.00077819	371	371
RBM27	-0.194894	0.00015839	0.00077819	371	371
MTRF1	-0.194893	0.000158396	0.00077819	371	371
TSPAN18	-0.194873	0.000158643	0.000779214	371	371
RAPH1	-0.194814	0.000159398	0.00078273	371	371
MOCS2	-0.194764	0.000160021	0.000785402	371	371
ZNF717	-0.194734	0.00016041	0.000786921	371	364
MKL2	-0.194703	0.000160799	0.000788634	371	371
DPH1	-0.194675	0.000161162	0.000790222	371	371
RBP4	-0.194604	0.000162073	0.000794102	371	371
TCHH	-0.19459	0.000162245	0.000794748	371	346
MAST4	-0.194574	0.000162458	0.000795597	371	371
CPS1	-0.194535	0.000162952	0.000797623	371	371
PCDHB7	-0.194514	0.000163221	0.000798743	371	365
PGRMC2	-0.194475	0.000163733	0.000801052	371	371
ANKRD28	-0.194401	0.000164699	0.000804991	371	371
C6orf208	-0.194365	0.000165164	0.000806868	371	367
FAM168A	-0.194316	0.000165799	0.000809569	371	371
NCR1	-0.194176	0.000167654	0.000817425	371	201
BCLAF1	-0.194147	0.000168032	0.000819067	371	371
OAF	-0.194067	0.000169095	0.00082405	371	371
LOC283922	-0.194032	0.000169567	0.000826145	371	367
PAFAH1B1	-0.194014	0.000169814	0.000827146	371	371
LOC283174	-0.193883	0.000171571	0.000834687	371	335
GNA11	-0.193765	0.000173177	0.000841731	371	371
C15orf51	-0.193743	0.000173487	0.00084298	371	281
ARID5B	-0.193631	0.000175018	0.000850003	371	371
FLT3	-0.193585	0.000175654	0.000852883	371	347
AHNAK	-0.193564	0.000175944	0.000854082	371	371
PTCD2	-0.193501	0.000176823	0.000857723	371	371
ANXA1	-0.193484	0.000177062	0.000858467	371	371
PABPC4L	-0.19344	0.000177672	0.000861004	371	366
PHF3	-0.193349	0.000178953	0.00086658	371	371
FAM149B1	-0.193341	0.000179069	0.000866928	371	371
ENDOD1	-0.193277	0.000179967	0.000871062	371	371
TYW1	-0.193252	0.000180321	0.000872564	371	371
C4orf33	-0.193244	0.000180438	0.000872921	371	371
STON1	-0.193214	0.000180867	0.000874782	371	371
SNX9	-0.19321	0.000180924	0.000874782	371	371
KIT	-0.193141	0.000181902	0.000878722	371	369
CCNL1	-0.193121	0.000182187	0.000879885	371	371
IPPK	-0.193108	0.000182376	0.000880482	371	371
LONRF1	-0.192984	0.000184167	0.000888158	371	371
PCDHB17	-0.192969	0.000184374	0.00088894	371	247
G3BP1	-0.192961	0.000184503	0.000889133	371	371
PCMTD2	-0.192955	0.000184589	0.00088933	371	371
SFRS12	-0.192947	0.000184706	0.000889681	371	371
RAB6C	-0.192911	0.000185227	0.000891971	371	371
VPS26B	-0.192814	0.000186645	0.000897935	371	371
DDX5	-0.192793	0.000186941	0.000899139	371	371
ZNF426	-0.192779	0.000187159	0.000899973	371	366
TMEM143	-0.192726	0.000187925	0.000903218	371	371
IL12RB2	-0.192687	0.000188512	0.000905822	371	367
CCNI	-0.192642	0.000189182	0.000908564	371	371
SH3YL1	-0.192595	0.000189871	0.000911255	371	371
CELF1	-0.192534	0.000190782	0.000915185	371	371
PITPNM3	-0.192522	0.000190969	0.000915862	371	364
ATP5S	-0.192506	0.000191202	0.00091621	371	371
PROS1	-0.192484	0.000191533	0.000917461	371	371
EXOC6B	-0.192465	0.000191813	0.000918582	371	369
DHX33	-0.192424	0.000192434	0.000921334	371	370
PLIN4	-0.192339	0.000193718	0.000927258	371	371
C1QTNF7	-0.192332	0.000193822	0.000927378	371	354
CIDEA	-0.192331	0.000193845	0.000927378	371	110
JUNB	-0.192308	0.000194188	0.000928615	371	371
GCSH	-0.192284	0.000194559	0.000930165	371	371
TGFBI	-0.192242	0.000195191	0.000932966	371	371
QRFPR	-0.192236	0.000195291	0.000933046	371	227
EHD3	-0.192229	0.00019539	0.000933243	371	371
NPAT	-0.192198	0.000195872	0.000934872	371	371
COL4A1	-0.192171	0.000196286	0.000936626	371	371
SLC13A3	-0.192029	0.000198479	0.000945958	371	371
FAM176A	-0.192007	0.00019882	0.000947128	371	371
TNFRSF19	-0.191944	0.000199809	0.000950703	371	371
PALMD	-0.191939	0.000199885	0.000950839	371	371
C4orf3	-0.191935	0.000199938	0.000950863	371	371
CAPN7	-0.191749	0.000202874	0.000963217	371	371
PPFIA1	-0.191735	0.00020309	0.000964012	371	371
TBX20	-0.191731	0.000203155	0.000964089	371	88
AFAP1L2	-0.191668	0.000204152	0.000968592	371	371
CHST8	-0.191639	0.000204621	0.000970353	371	279
C14orf167	-0.191613	0.000205031	0.000971835	371	371
ACADVL	-0.191596	0.0002053	0.000972879	371	371
KIAA0831	-0.191577	0.000205618	0.000974155	371	371
ANXA7	-0.191559	0.000205894	0.00097523	371	371
EFNB3	-0.191456	0.000207556	0.000982402	371	360
KLRF1	-0.19137	0.00020895	0.000988305	371	357
CGGBP1	-0.19137	0.000208952	0.000988305	371	371
USP54	-0.191358	0.000209154	0.000988929	371	371
PCDHGA4	-0.191356	0.000209183	0.000988929	371	352
CLPB	-0.191289	0.000210288	0.000993914	371	371
ABAT	-0.191261	0.000210746	0.000995846	371	371
PTH1R	-0.191154	0.000212498	0.00100389	371	369
MMP21	-0.191144	0.000212665	0.00100443	371	248
LAMC3	-0.191058	0.000214094	0.00101071	371	371
PTGDR	-0.191052	0.00021419	0.00101092	371	359
FLJ11235	-0.190941	0.000216051	0.00101922	371	366
ESD	-0.19091	0.000216578	0.00102141	371	371
TXNRD3IT1	-0.190908	0.000216617	0.00102141	371	371
HTR1B	-0.190823	0.000218042	0.00102764	371	188
TTC28	-0.190799	0.000218459	0.00102887	371	371
CREB3L2	-0.190791	0.000218583	0.00102921	371	371
MAPK10	-0.190773	0.000218891	0.00103042	371	365
CNDP1	-0.190752	0.000219253	0.00103188	371	323
CTNNA3	-0.190645	0.000221075	0.00104021	371	313
CALCOCO2	-0.190636	0.000221239	0.00104074	371	371
MBNL2	-0.190612	0.000221641	0.00104228	371	371
MINPP1	-0.190528	0.000223096	0.00104823	371	371
UBXN8	-0.190475	0.000224026	0.00105186	371	371
C5orf24	-0.190457	0.000224339	0.00105283	371	371
GIMAP1	-0.190439	0.000224643	0.00105401	371	371
TNKS1BP1	-0.190231	0.000228291	0.00106962	371	371
TTLL10	-0.190187	0.000229085	0.00107258	371	232
CLDN5	-0.190177	0.000229249	0.0010731	371	371
CLEC1B	-0.190098	0.000230667	0.00107847	371	111
C14orf53	-0.190058	0.000231384	0.00108132	371	186
LOC728323	-0.190053	0.000231475	0.00108148	371	361
ZNF460	-0.190023	0.000232013	0.00108374	371	371
YPEL5	-0.189921	0.000233837	0.00109169	371	371
RCOR1	-0.18988	0.000234595	0.00109452	371	371
PHC3	-0.189846	0.000235212	0.00109714	371	371
GCGR	-0.189789	0.00023625	0.00110126	371	354
CSGALNACT2	-0.18977	0.000236592	0.00110255	371	371
TGOLN2	-0.189684	0.000238172	0.00110939	371	371
PIGV	-0.189638	0.000239025	0.0011131	371	371
PLA2G5	-0.189626	0.000239245	0.00111361	371	370
PPP2R5B	-0.189621	0.00023933	0.00111363	371	371
PEPD	-0.189619	0.000239362	0.00111363	371	371
DNAJC12	-0.189555	0.000240558	0.00111815	371	371
HIST1H2AC	-0.189544	0.000240758	0.00111882	371	371
C17orf103	-0.189504	0.000241508	0.00112178	371	371
KIAA0182	-0.189483	0.000241892	0.00112304	371	371
DLG4	-0.189428	0.000242917	0.00112717	371	371
SPATA13	-0.189414	0.000243194	0.00112803	371	371
NUP88	-0.189394	0.000243558	0.00112928	371	371
CDK8	-0.189393	0.000243576	0.00112928	371	368
TTC19	-0.189342	0.000244541	0.00113349	371	371
ASXL2	-0.189271	0.000245881	0.00113944	371	371
LOC572558	-0.189254	0.000246198	0.00114064	371	143
[truncated: 4,226 more rows]
